# Supplementary material
Source: MDPI journal article supplement (https://www.mdpi.com/2073-4344/12/5/516)
Supplement: s1 [file s1]

## Hydrogenation of CO<sub>2</sub> on nanostructured Cu/FeO<sub>x</sub> catalysts: The effect of morphology and Cu load on selectivity

Karolína Simkovičová<sup>1,2</sup>, Muhammad I. Qadir<sup>1</sup>, Naděžda Žilková<sup>1</sup>, Joanna E. Olszówka<sup>1</sup>, Pavel Sialini<sup>3</sup>,  
Libor Kvítek<sup>2\*</sup> and Štefan Vajda<sup>1\*</sup>

<sup>1</sup> Department of Nanocatalysis, J. Heyrovský Institute of Physical Chemistry v.v.i., Czech Academy of Sciences, Dolejškova 2155/3, 182 23 Prague 8, Czech Republic.

<sup>2</sup> Department of Physical Chemistry, Faculty of Science, Palacký University Olomouc, 17. listopadu 12, 77900 Olomouc, Czech Republic.

<sup>3</sup> Laboratory of Surface Analysis, University of Chemistry and Technology, Technická 3, 16628 Prague, Czech Republic.

\* Correspondence: stefan.vajda@jh-inst.cas.cz (SV) and libor.kvitek@upol.cz (LK)

### Table of content:

|            |                                                                                                                                     |     |
|------------|-------------------------------------------------------------------------------------------------------------------------------------|-----|
| Figure S1  | Temperature ramp.....                                                                                                               | S2  |
| Figure S2  | SEM/EDX of fresh catalysts .....                                                                                                    | S3  |
| Figure S3  | STEM/HAADF images of fresh FeO <sub>x</sub> .....                                                                                   | S4  |
| Figure S4  | STEM/HAADF images of fresh 1%-Cu/FeO <sub>x</sub> .....                                                                             | S5  |
| Figure S5  | STEM/HAADF images of fresh 3%-Cu/FeO <sub>x</sub> .....                                                                             | S6  |
| Figure S6  | STEM/HAADF images of fresh 5%-Cu/FeO <sub>x</sub> .....                                                                             | S7  |
| Figure S7  | XRD patterns of fresh catalysts .....                                                                                               | S8  |
| Table S1   | X-ray coherence length of fresh catalysts.....                                                                                      | S9  |
| Figure S8  | XPS of fresh and spent catalysts.....                                                                                               | S10 |
| Figure S9  | XPS of FeO <sub>x</sub> .....                                                                                                       | S11 |
| Table S2   | Chemical composition of Fe and Cu in catalysts .....                                                                                | S11 |
| Figure S10 | Wide scan XPS spectra of fresh and spent catalysts .....                                                                            | S12 |
| Figure S11 | Adsorption/desorption isotherms of fresh catalysts .....                                                                            | S13 |
| Figure S12 | UV-Vis spectra of fresh catalysts.....                                                                                              | S14 |
| Table S3   | Conversion and selectivities of FeO <sub>x</sub> , 1%-Cu/FeO <sub>x</sub> , 3%-Cu/FeO <sub>x</sub> and 5%-Cu/FeO <sub>x</sub> ..... | S15 |
| Figure S13 | TEM images of fresh and spent catalysts.....                                                                                        | S16 |
| Figure S14 | SEM/EDX of spent catalysts.....                                                                                                     | S17 |
| Figure S15 | STEM/HAADF images of spent FeO <sub>x</sub> .....                                                                                   | S18 |
| Figure S16 | STEM/HAADF images of spent 1%-Cu/FeO <sub>x</sub> .....                                                                             | S19 |
| Figure S17 | STEM/HAADF images of spent 3%-Cu/FeO <sub>x</sub> .....                                                                             | S20 |
| Figure S18 | XRD patterns of spent catalysts .....                                                                                               | S21 |
| Table S4   | Mean X-ray coherence length of spent catalysts.....                                                                                 | S22 |
| Figure S19 | Adsorption/desorption isotherms of spent catalysts .....                                                                            | S23 |
| Figure S20 | Comparison of the performance of the catalysts .....                                                                                | S24 |
| Figure S21 | CO <sub>2</sub> conversion and selectivity over the course of 6 consecutive temperature ramps .....                                 | S25 |
| Table S5   | Literature comparison of CO <sub>2</sub> hydrogenation by different iron-based catalysts .....                                      | S26 |
| Figure S22 | Literature comparison of CO <sub>2</sub> hydrogenation by different iron-based catalysts .....                                      | S27 |
|            | References.....                                                                                                                     | S28 |

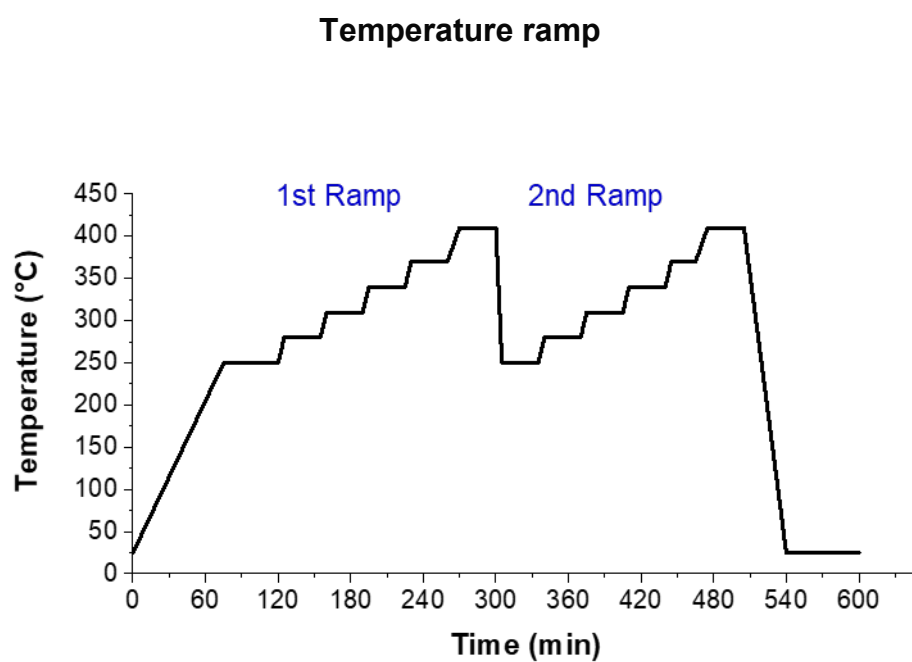

**Figure S1.** Double temperature ramp applied during catalytic testing. 200 mg of catalyst and CO<sub>2</sub>/H<sub>2</sub>/He (1:5:4, total flow 25 ml/min).

## SEM/EDX of fresh catalysts

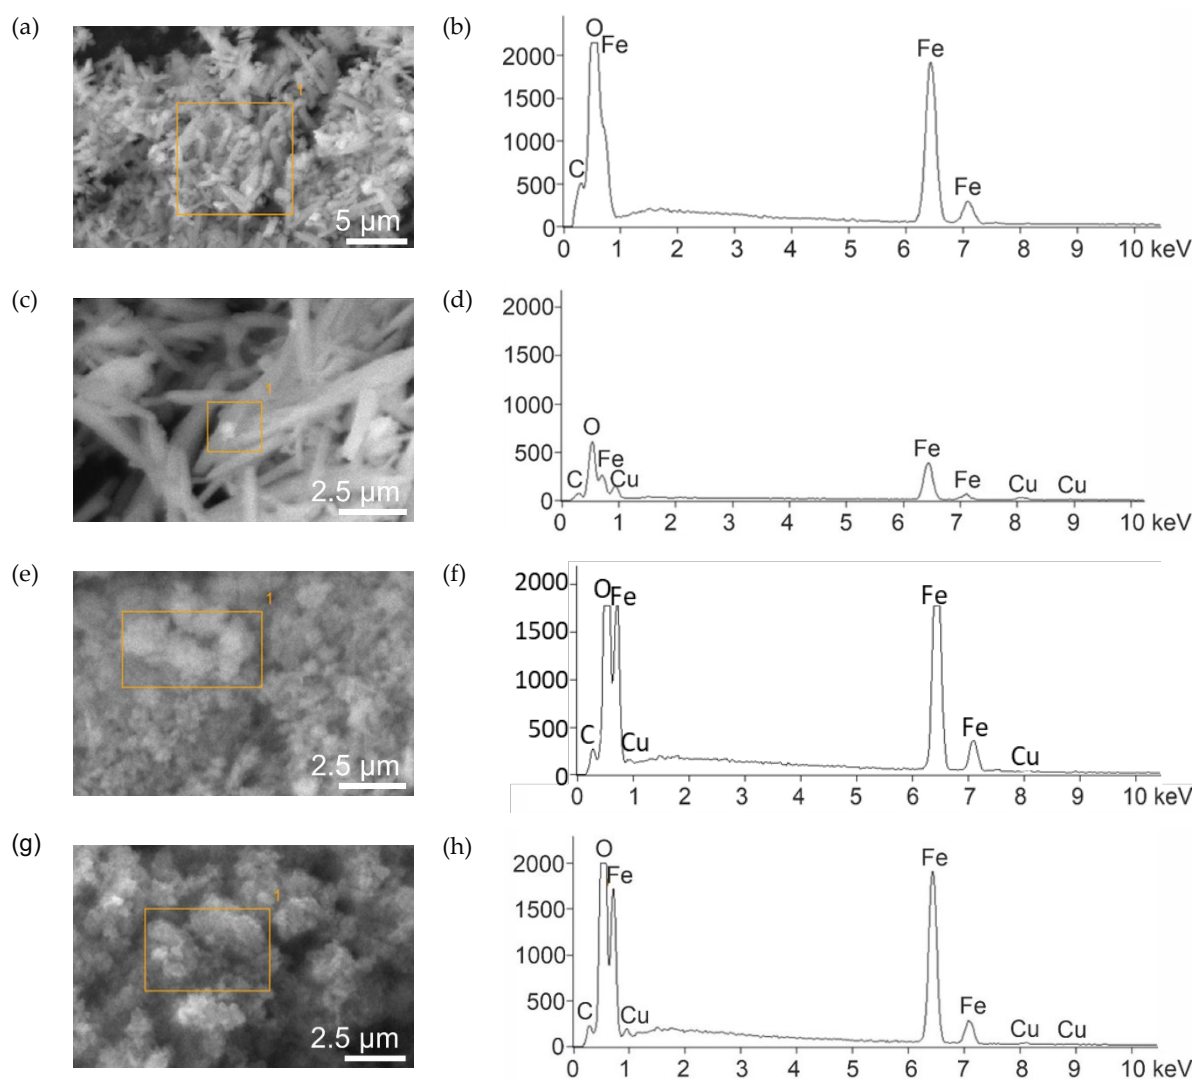

**Figure S2.** SEM images of fresh catalysts and EDX of the selected part of the image in highlighted rectangles with included particles, (a, b) FeO<sub>x</sub>, (c, d) 1%-Cu/FeO<sub>x</sub>, (e, f) 3%-Cu/FeO<sub>x</sub> and (g, h) 5%-Cu/FeO<sub>x</sub>.

### STEM/HAADF images of fresh FeO<sub>x</sub>

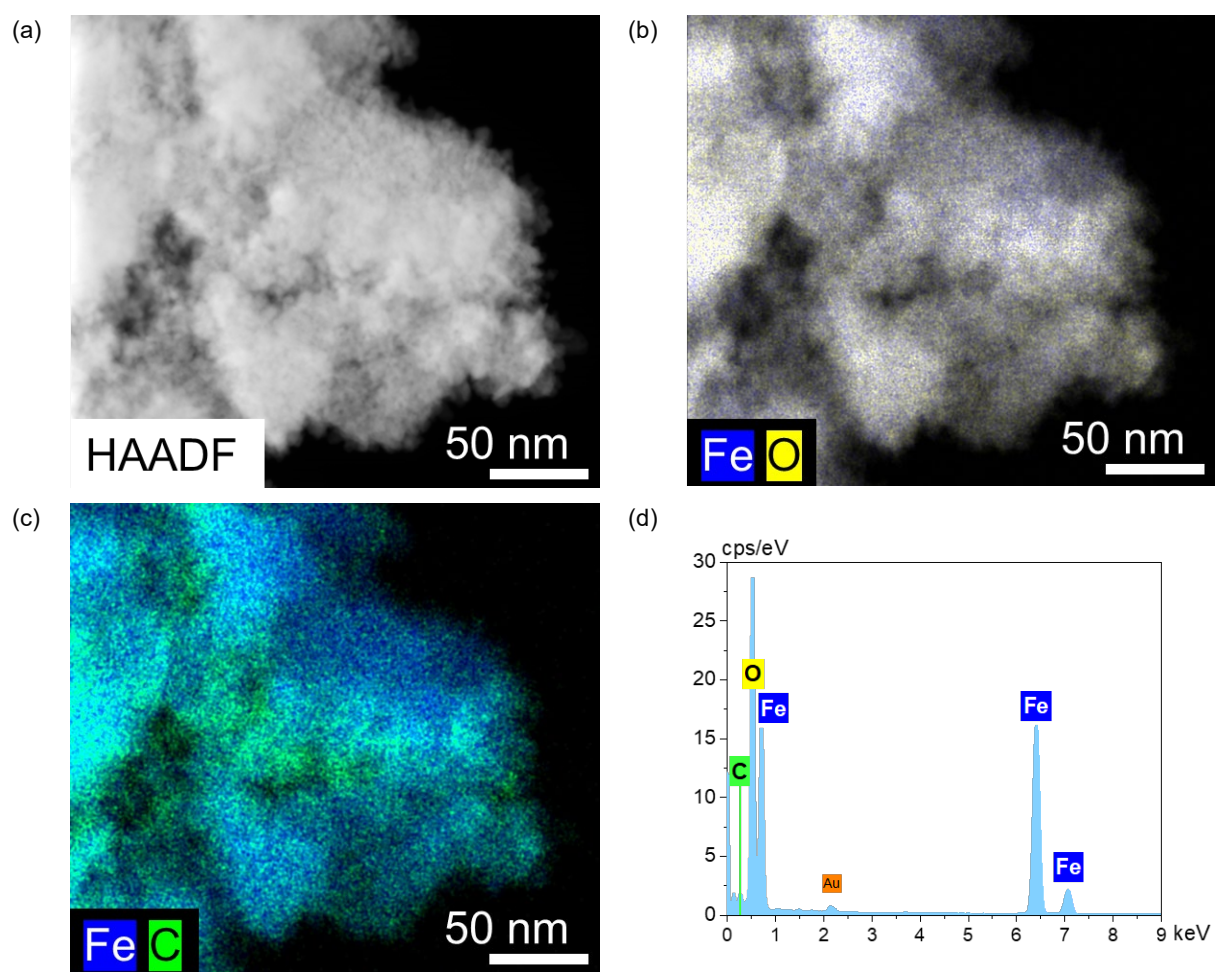

**Figure S3.** (a) STEM-HAADF of fresh FeO<sub>x</sub>, and (b-d) EDX elemental mapping (red: Fe, yellow: O, green: C)

### STEM/HAADF images of fresh 1%-Cu/FeO<sub>x</sub>

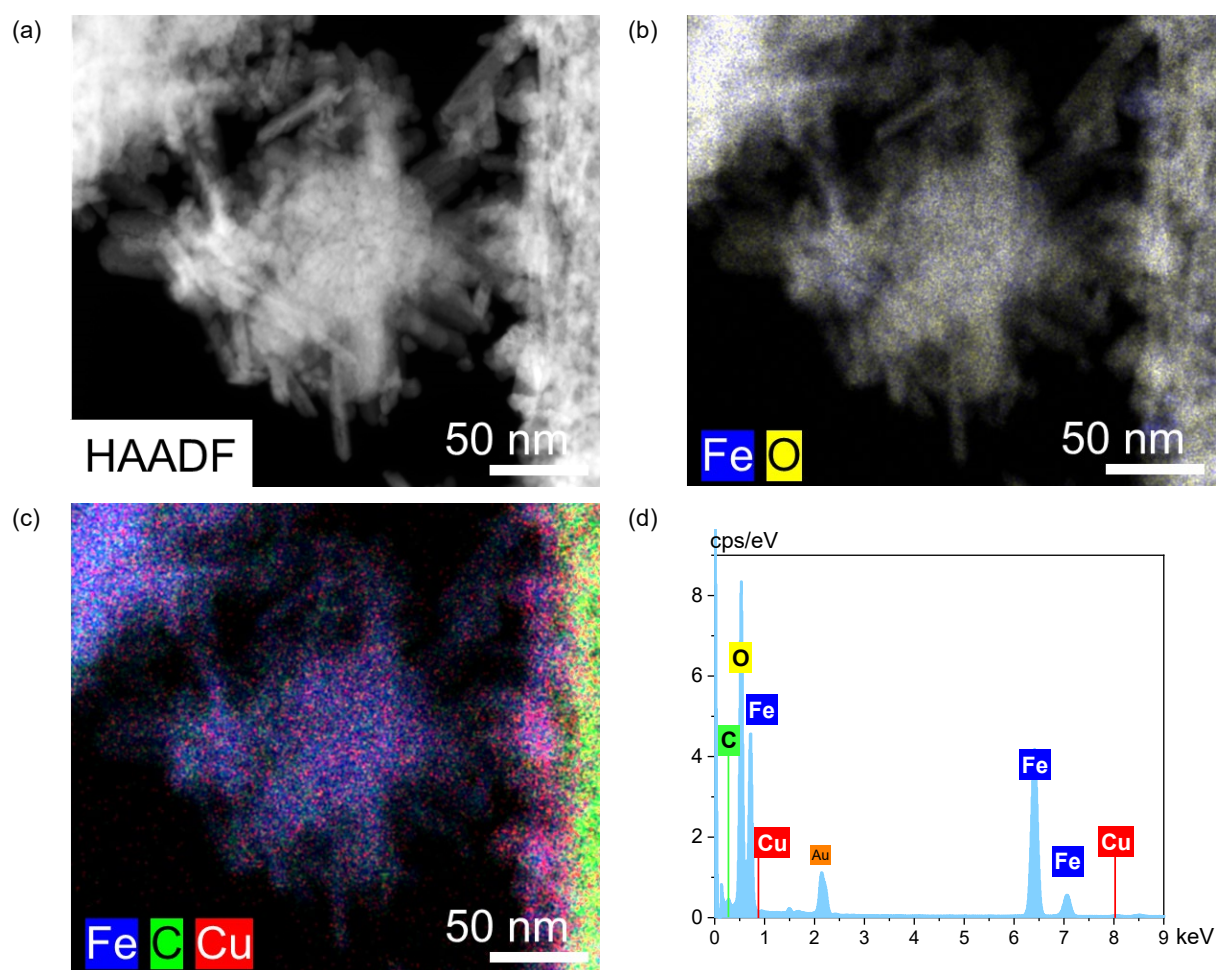

**Figure S4.** (a) STEM-HAADF of fresh 1%-Cu/FeO<sub>x</sub>, and (b-d) EDX elemental mapping of Fe, O, C and Cu.



# STEM/HAADF images of fresh 3%-Cu/FeO<sub>x</sub>

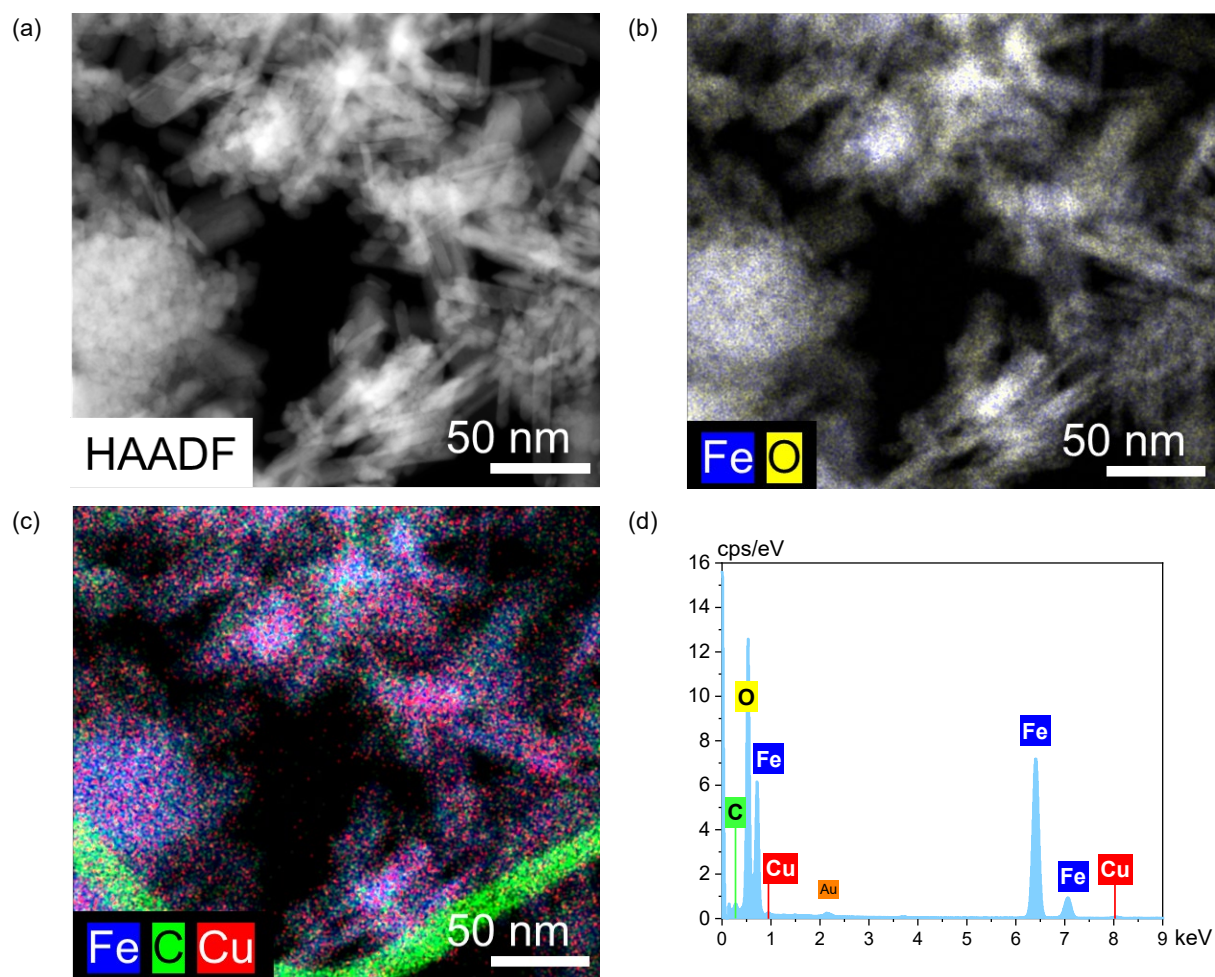

**Figure S5.** (a) STEM-HAADF of fresh 3%-Cu/FeO<sub>x</sub>, and (b-d) EDX elemental mapping of Fe, O, C and Cu.

### STEM/HAADF images of fresh 5%-Cu/FeO<sub>x</sub>

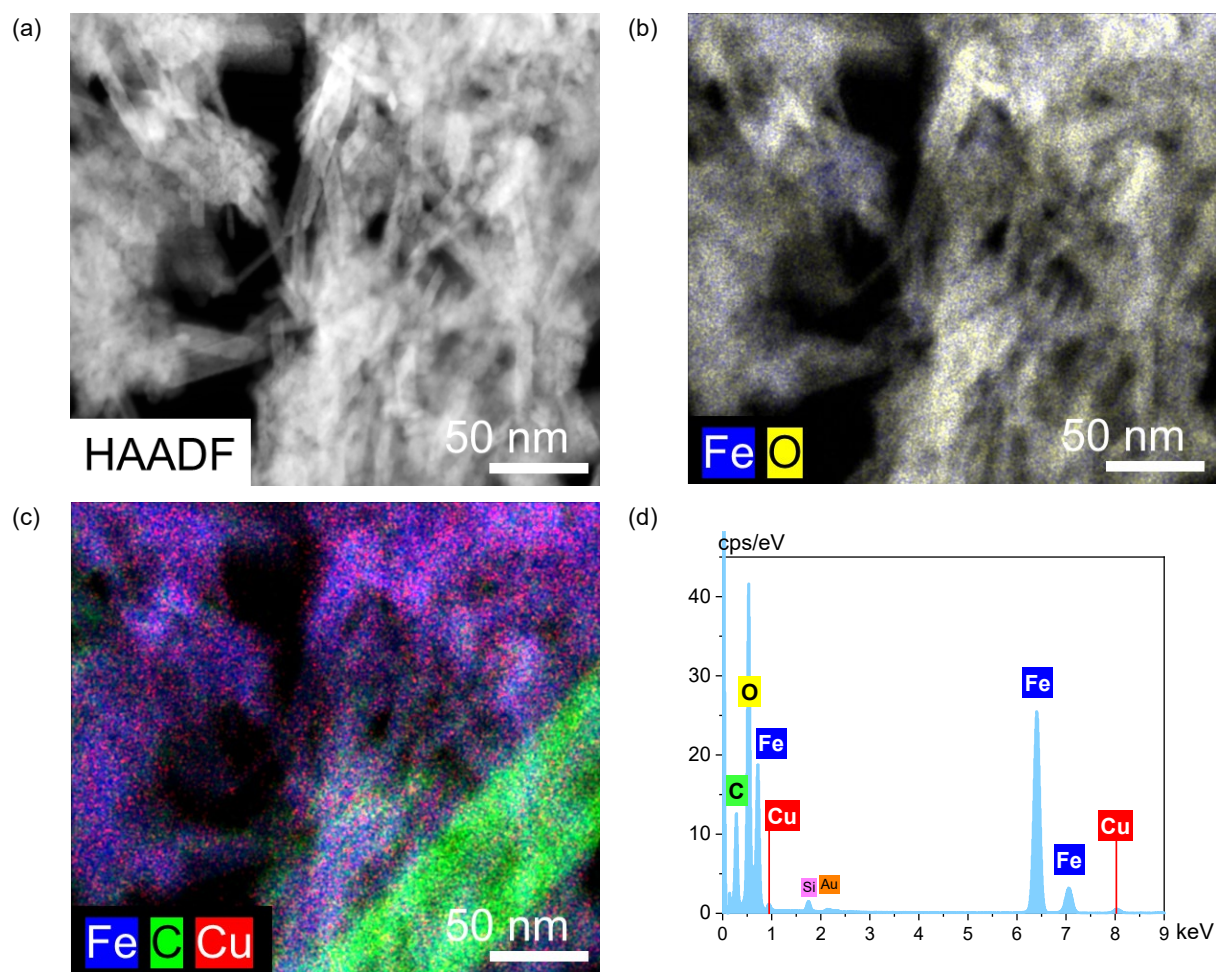

**Figure S6** (a) STEM-HAADF of fresh 5%-Cu/FeO<sub>x</sub>, and (b-d) EDX elemental mapping of Fe, O, C and Cu.

## XRD patterns of fresh catalysts

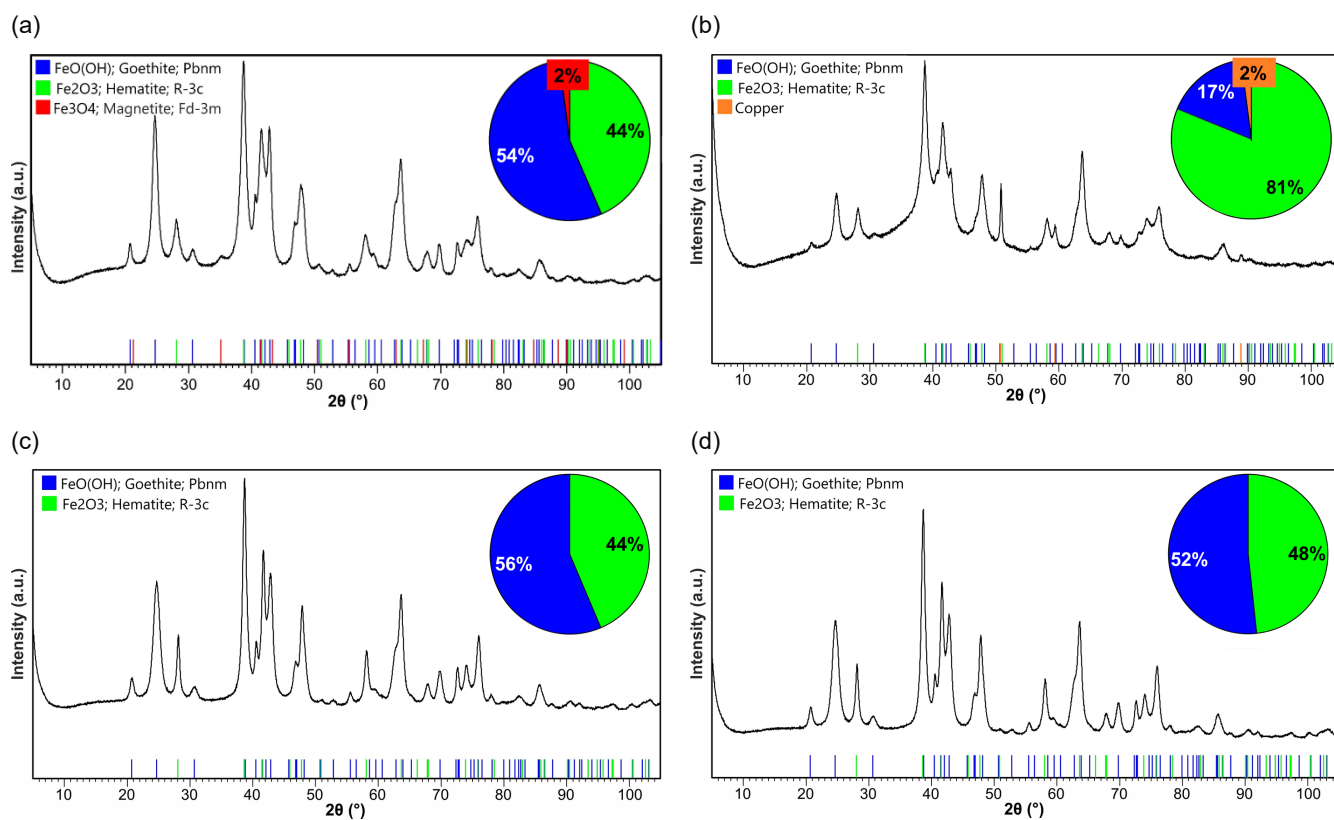

**Figure S7.** XRD patterns of fresh (a) FeO<sub>x</sub>, (b) 1%-Cu/FeO<sub>x</sub>, (c) 3%-Cu/FeO<sub>x</sub> and (d) 5%-Cu/FeO<sub>x</sub>.



## Mean X-ray coherence length of fresh catalysts

**Table S1.** Mean X-ray coherence length of fresh catalysts obtained from XRD data using Rietveld refinement of analysis.

| Catalyst              | $\alpha\text{-Fe}_2\text{O}_3$<br>[nm] | $\alpha\text{-FeO(OH)}$<br>[nm] | $\text{Fe}_3\text{O}_4$<br>[nm] |
|-----------------------|----------------------------------------|---------------------------------|---------------------------------|
| $\text{FeO}_x$        | 9                                      | 12                              | 11                              |
| 1%-Cu/ $\text{FeO}_x$ | 12                                     | 11                              | 0.0                             |
| 3%-Cu/ $\text{FeO}_x$ | 19                                     | 9                               | 0.0                             |
| 5%-Cu/ $\text{FeO}_x$ | 19                                     | 10                              | 0.0                             |

## XPS of fresh and spent catalysts

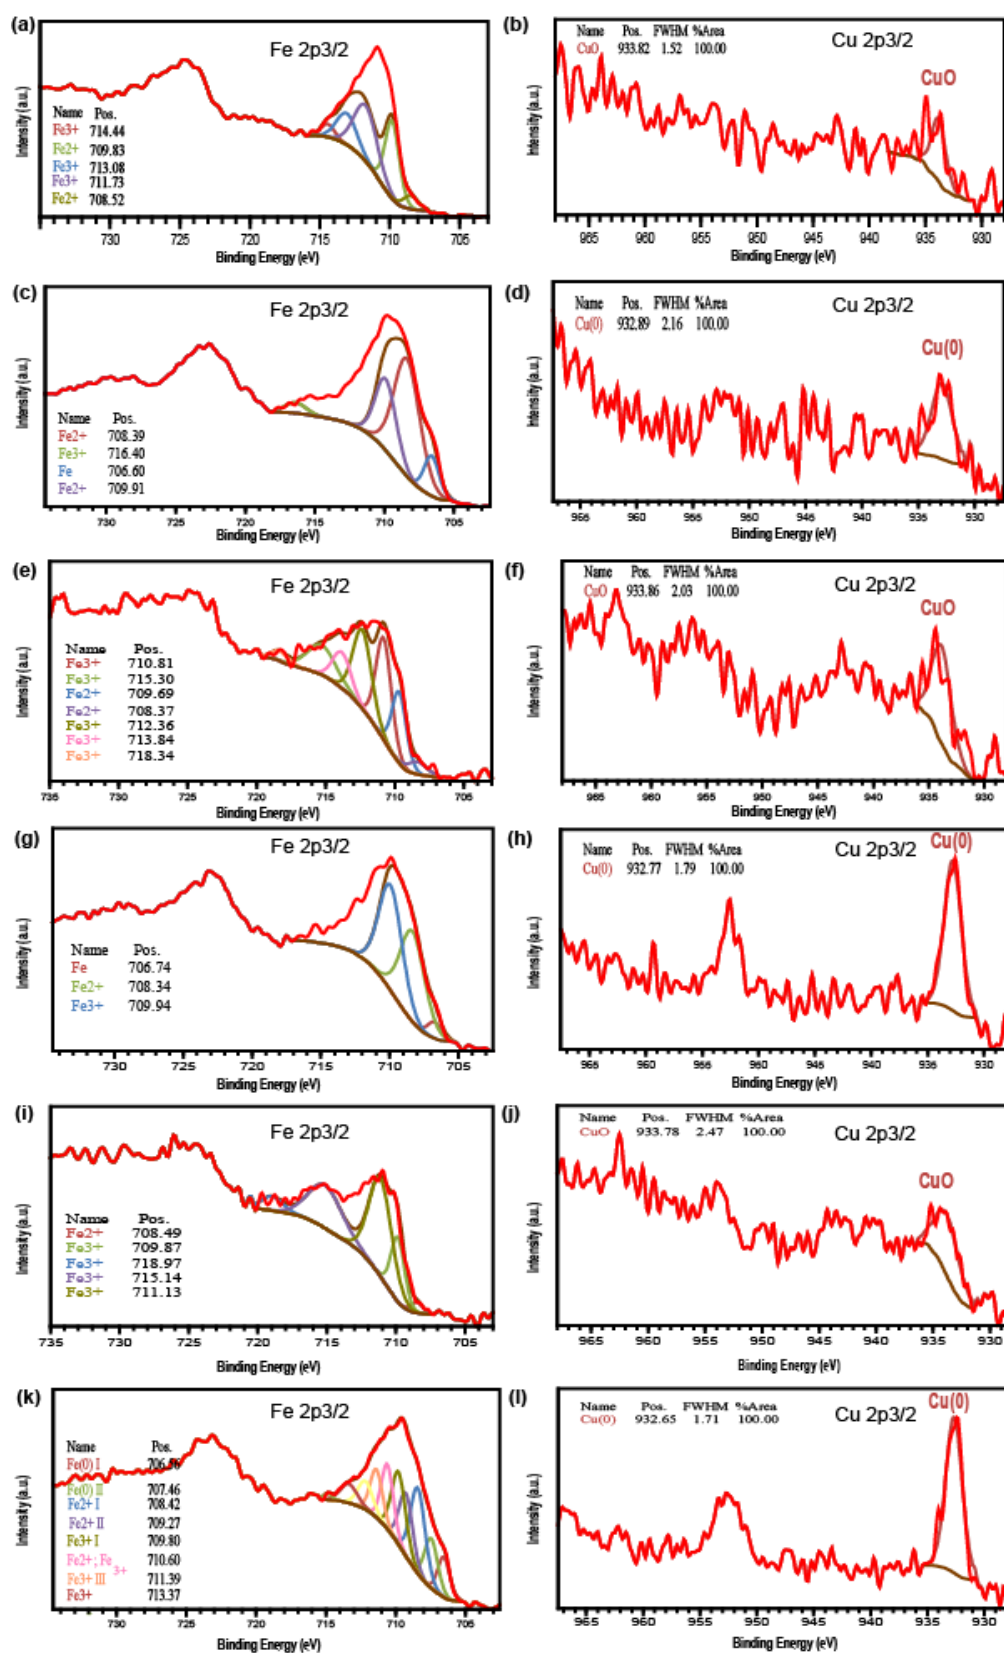

**Figure S8.** XPS analysis; quantification and deconvoluted spectra of copper and iron for catalysts (a, b) fresh 1%-Cu/FeO<sub>x</sub>, (c, d) spent 1%-Cu/FeO<sub>x</sub>, (e, f) fresh 3%-Cu/FeO<sub>x</sub>, (g, h) spent 3%-Cu/FeO<sub>x</sub>, (i, j) fresh 5%-Cu/FeO<sub>x</sub>, and (k, l) spent 5%-Cu/FeO<sub>x</sub>

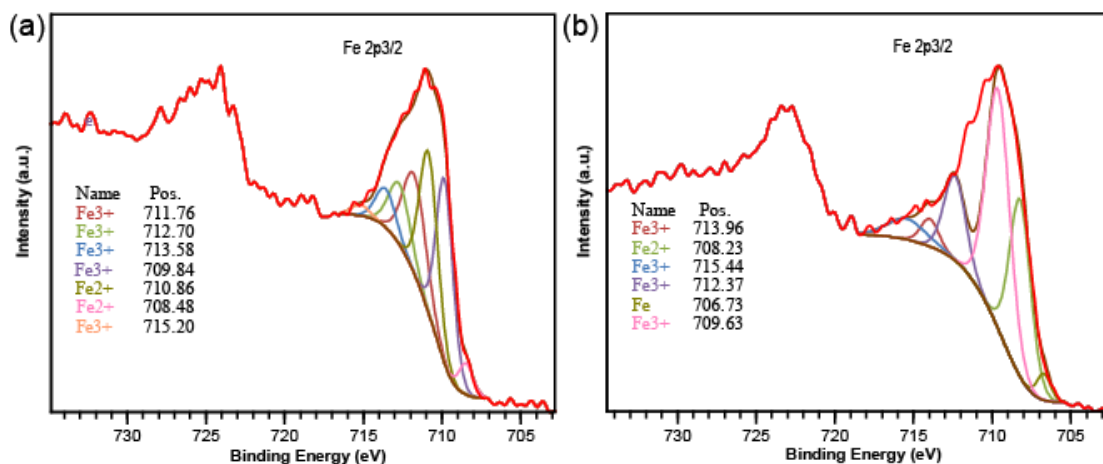

**Figure S9.** XPS analysis; quantification and deconvoluted spectra iron for catalysts (a) fresh FeO<sub>x</sub>, and (b) spent FeO<sub>x</sub>.

**Table S2.** Chemical composition of Fe and Cu in catalysts.

| Catalyst                    | Fe(0) | Fe2+ | Fe3+ | Cu2+ | Cu(0) |
|-----------------------------|-------|------|------|------|-------|
| Fresh 1%Cu/FeO <sub>x</sub> | -     | +    | +    | +    | -     |
| Spent 1%Cu/FeO <sub>x</sub> | +     | +    | +    | -    | +     |
| Fresh 3%Cu/FeO <sub>x</sub> | -     | +    | +    | +    | -     |
| Spent 3%Cu/FeO <sub>x</sub> | +     | +    | +    | -    | +     |
| Fresh 5%Cu/FeO <sub>x</sub> | -     | +    | +    | +    | -     |
| Spent 5%Cu/FeO <sub>x</sub> | +     | +    | +    | -    | +     |
| Fresh FeO <sub>x</sub>      | -     | +    | +    | -    | -     |
| Spent FeO <sub>x</sub>      | +     | +    | +    | -    | -     |

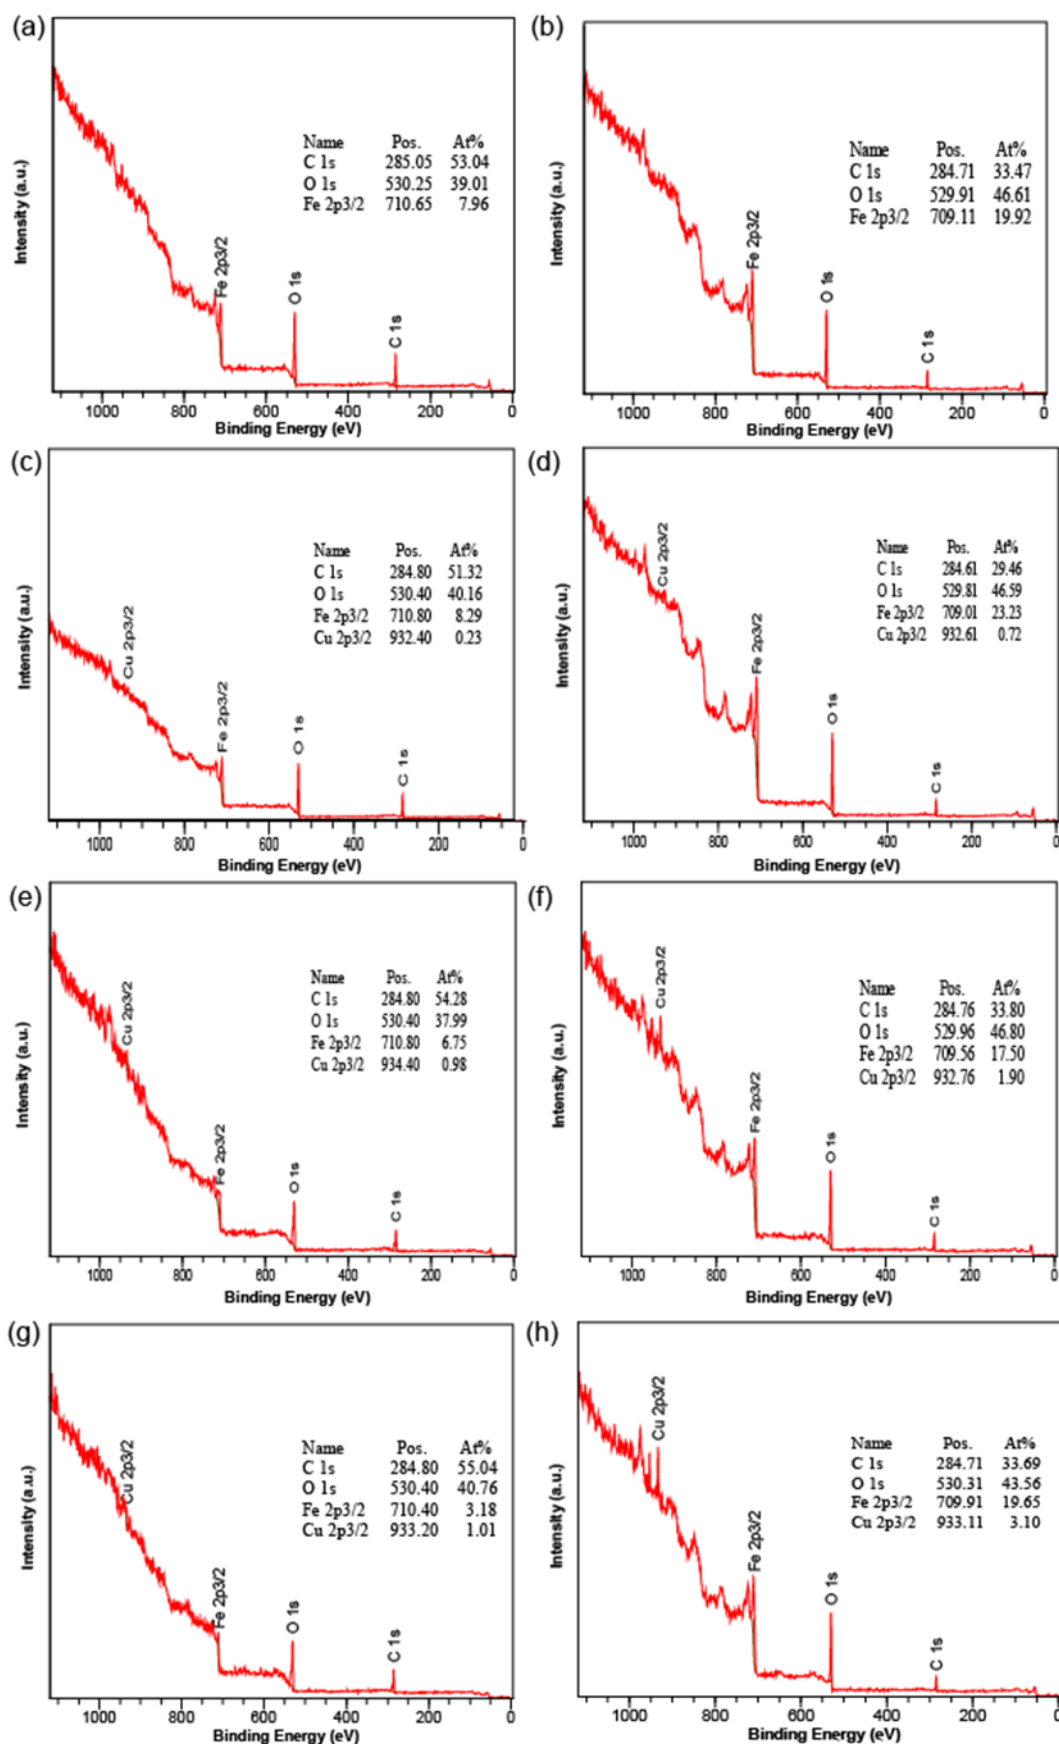

**Figure S10.** Wide scan XPS spectra of (a, b) fresh and spent FeO<sub>x</sub>, (c, d) fresh and spent 1%-Cu/FeO<sub>x</sub>, (e, f) fresh and spent 3%-Cu/FeO<sub>x</sub>, (g, h) fresh and spent 5%-Cu/FeO<sub>x</sub>, respectively.

## Adsorption/desorption isotherms of fresh catalysts

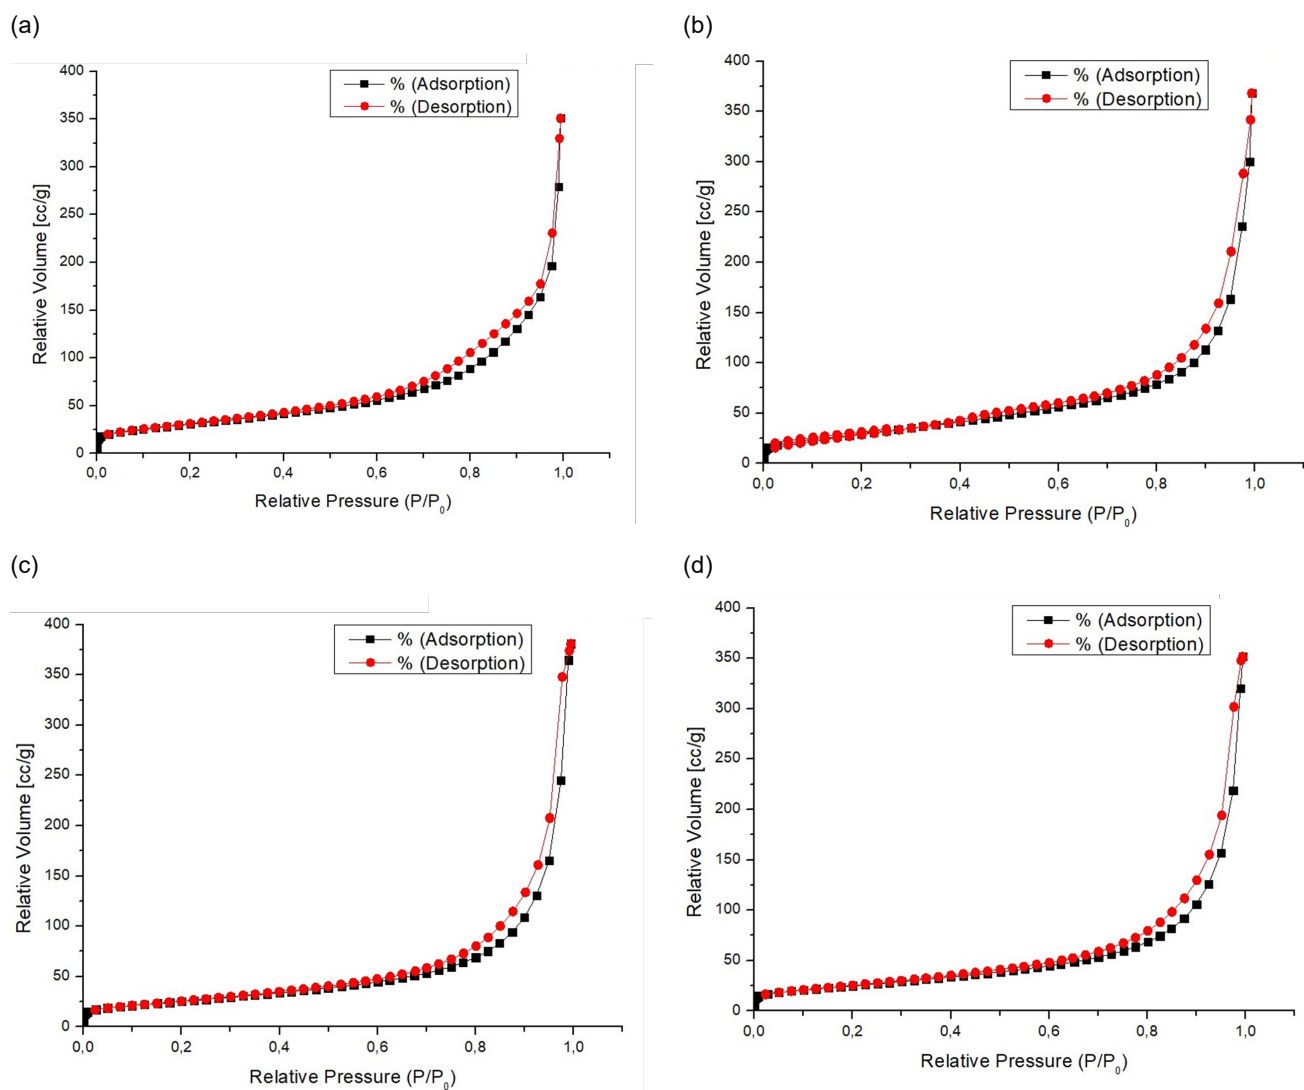

**Figure S11.** Adsorption and desorption isotherms of fresh (a) blank  $\text{FeO}_x$ , (b) 1%-Cu/ $\text{FeO}_x$ , (c) 3%-Cu/ $\text{FeO}_x$  and (d) 5%-Cu/ $\text{FeO}_x$ .



### UV-Vis spectra of fresh catalysts

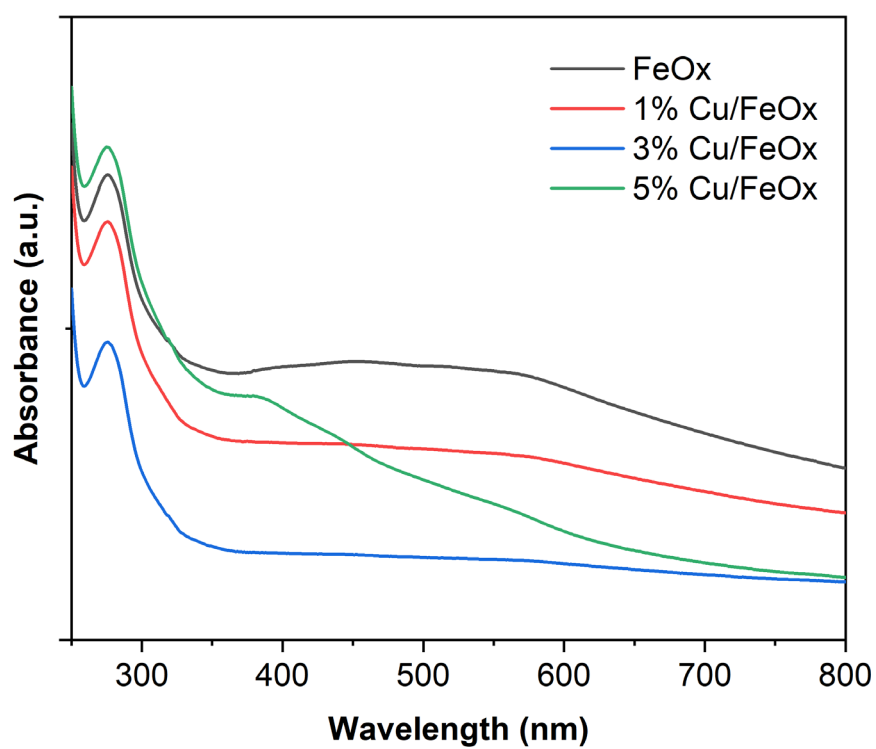

**Figure S12.** UV-Vis spectra of fresh catalysts. The spectra were recorded in glycerol.

# **Conversion and selectivities of FeO<sub>x</sub>, 1%-Cu/FeO<sub>x</sub>, 3%-Cu/FeO<sub>x</sub> and 5%-Cu/FeO<sub>x</sub>**

**Table S3:** CO<sub>2</sub> conversion and product selectivities during 1<sup>st</sup> and 2<sup>nd</sup> temperature ramps. Reaction mixture was CO<sub>2</sub>, H<sub>2</sub> and He in the ratio of 1:5:4 giving 11 % and 49 % of CO<sub>2</sub> and H<sub>2</sub> in He, respectively. Total flow 25 mL/min, pressure 1 bar. Products were analysed by gas chromatography.

| Cat.                   | T [°C] | CO <sub>2</sub><br>conversion<br>[%] |      | Selectivity [%] |      |                                |      |                                  |      |                  |      |     |      |
|------------------------|--------|--------------------------------------|------|-----------------|------|--------------------------------|------|----------------------------------|------|------------------|------|-----|------|
|                        |        |                                      |      | CH <sub>4</sub> |      | C <sub>2</sub> -C <sub>4</sub> |      | C <sub>2</sub> -C <sub>4</sub> = |      | C <sub>5</sub> + |      | CO  |      |
|                        |        | ramp                                 | 1.   | 2.              | 1.   | 2.                             | 1.   | 2.                               | 1.   | 2.               | 1.   | 2.  | 1.   |
| FeO <sub>x</sub>       | 250    | 1.5                                  | -    | 100             | 100  | -                              | -    | -                                | -    | -                | -    | -   | -    |
|                        | 280    | 2                                    | 0.7  | 100             | 100  | -                              | -    | -                                | -    | -                | -    | -   | -    |
|                        | 310    | 3.1                                  | 2.4  | 90.9            | 81.5 | -                              | -    | 9.1                              | 6.2  | -                | -    | -   | 12.3 |
|                        | 340    | 7.9                                  | 6.9  | 26.2            | 71.2 | 18                             | -    | 36.4                             | 14.4 | 19.5             | -    | -   | 14.5 |
|                        | 370    | 14.9                                 | 14   | 19.2            | 57.6 | 22.7                           | -    | 31.9                             | 10.5 | 26.2             | -    | -   | 31.9 |
|                        | 410    | 30.3                                 | 28.2 | 29.7            | 80   | 25                             | -    | 31.6                             | 20   | 13.7             | -    | -   | -    |
| 1%-Cu/FeO <sub>x</sub> | 250    | -                                    | 1.4  | -               | 69.5 | -                              | 22.8 | -                                | 6.1  | -                | -    | -   | 1.6  |
|                        | 280    | -                                    | 3.4  | 100             | 69.1 | -                              | 17.9 | -                                | 10.1 | -                | 1.25 | -   | 1.6  |
|                        | 310    | 3.5                                  | 8.3  | 39.5            | 66.5 | 12                             | 13.1 | 45                               | 16.1 | 3.4              | 2.2  | -   | 2.1  |
|                        | 340    | 14.7                                 | 13   | 50.1            | 65.4 | 13.6                           | 8.5  | 27                               | 21.8 | 6.6              | 2    | 2.7 | 2.4  |
|                        | 370    | 23.5                                 | 21.6 | 60.5            | 64.5 | 5.7                            | 5.8  | 29                               | 25.6 | 2.3              | 1.5  | 2.5 | 2.7  |
|                        | 410    | 34.7                                 | 34.4 | 73.3            | 75.2 | 3.4                            | 4.3  | 19.9                             | 17.4 | 0.5              | 0.4  | 3   | 2.7  |
| 3%-Cu/FeO <sub>x</sub> | 250    | 2.3                                  | 7.3  | 96              | 62.2 | -                              | 32.3 | -                                | -    | -                | 2.8  | 4   | 2.8  |
|                        | 280    | 6.2                                  | 10.9 | 83.5            | 58.5 | 5.2                            | 34.2 | 8.3                              | 2.2  | -                | 2.4  | 3.3 | 2.6  |
|                        | 310    | 13                                   | 17.3 | 67.7            | 56.7 | 11.4                           | 31.7 | 17.2                             | 5.6  | 1.3              | 3.5  | 2.8 | 2.5  |
|                        | 340    | 19.1                                 | 22.9 | 60.9            | 59.6 | 15.1                           | 24.2 | 18                               | 10.9 | 3.5              | 2.8  | 2.5 | 2.6  |
|                        | 370    | 27.3                                 | 26.8 | 62.7            | 66.3 | 17.7                           | 14.2 | 14.6                             | 15.1 | 2.3              | 1.4  | 2.7 | 3.1  |
|                        | 410    | 36.5                                 | 36.8 | 82.6            | 82.2 | 6.5                            | 6.2  | 6.9                              | 8    | 0.4              | -    | 3.6 | 3.6  |
| 5%-Cu/FeO <sub>x</sub> | 250    | 1.4                                  | 5.6  | 100             | 57   | -                              | 37.3 | -                                | 0.3  | -                | 2.9  | -   | 2.6  |
|                        | 280    | 5.6                                  | 11.8 | 78.4            | 55.3 | 8                              | 36.4 | 7.1                              | 1.8  | -                | 3.9  | 6.5 | 2.5  |
|                        | 310    | 12                                   | 17   | 69.3            | 54.3 | 17.7                           | 34.8 | 9                                | 3.5  | 1.3              | 4    | 2.7 | 3.3  |
|                        | 340    | 20                                   | 23.7 | 66.9            | 57.6 | 20.4                           | 29.7 | 6.8                              | 6.4  | 1.9              | 3    | 4.1 | 3.3  |
|                        | 370    | 27.8                                 | 29.5 | 78.3            | 68.6 | 12.3                           | 18.6 | 4.5                              | 7.2  | 0.4              | 1.3  | 4.4 | 4.3  |
|                        | 410    | 35                                   | 35.6 | 92.3            | 86.6 | 2.4                            | 4    | 0.2                              | 2.7  | -                | 1.3  | 5.1 | 5.4  |

## TEM images of fresh of fresh and spent catalysts

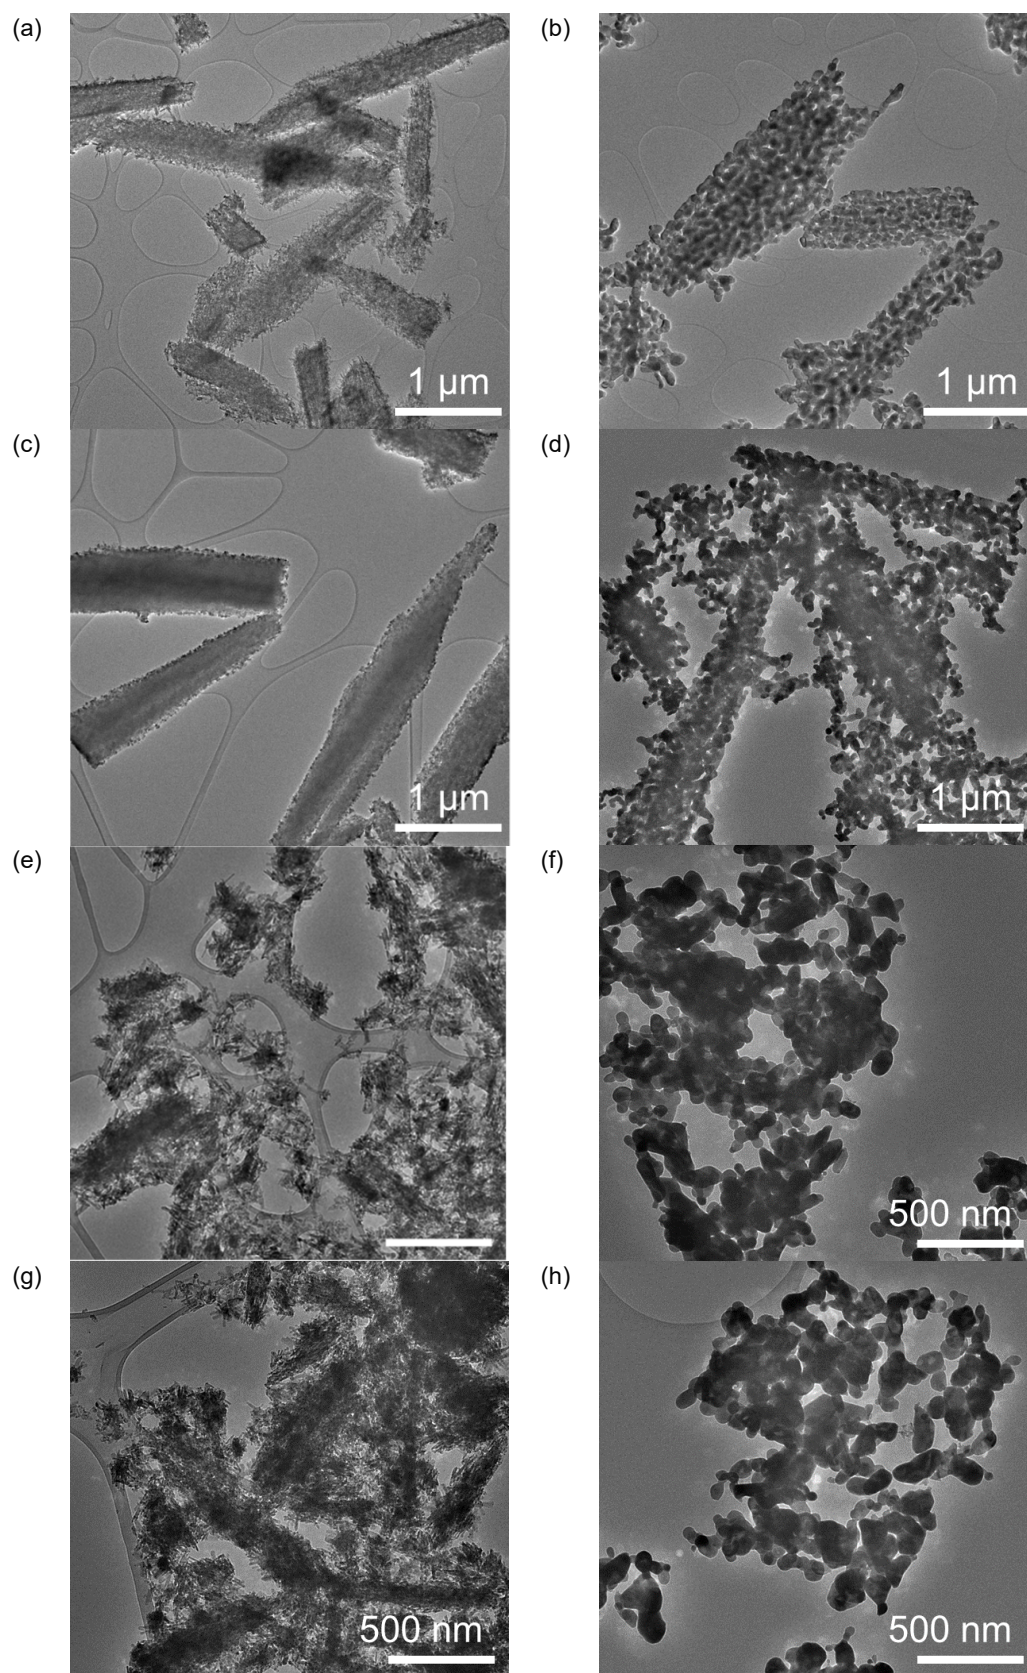

**Figure S13:** TEM images of (a) fresh FeO<sub>x</sub> and (b) spent FeO<sub>x</sub>, (c) fresh 1%-Cu/FeO<sub>x</sub> and (d) spent 1%-Cu/FeO<sub>x</sub>, (e) fresh 3%-Cu/FeO<sub>x</sub> and (f) spent 3%-Cu/FeO<sub>x</sub>, (g) fresh 5%-Cu/FeO<sub>x</sub> and (h) spent 5%-Cu/FeO<sub>x</sub> catalyst.

## SEM/EDX of spent catalysts

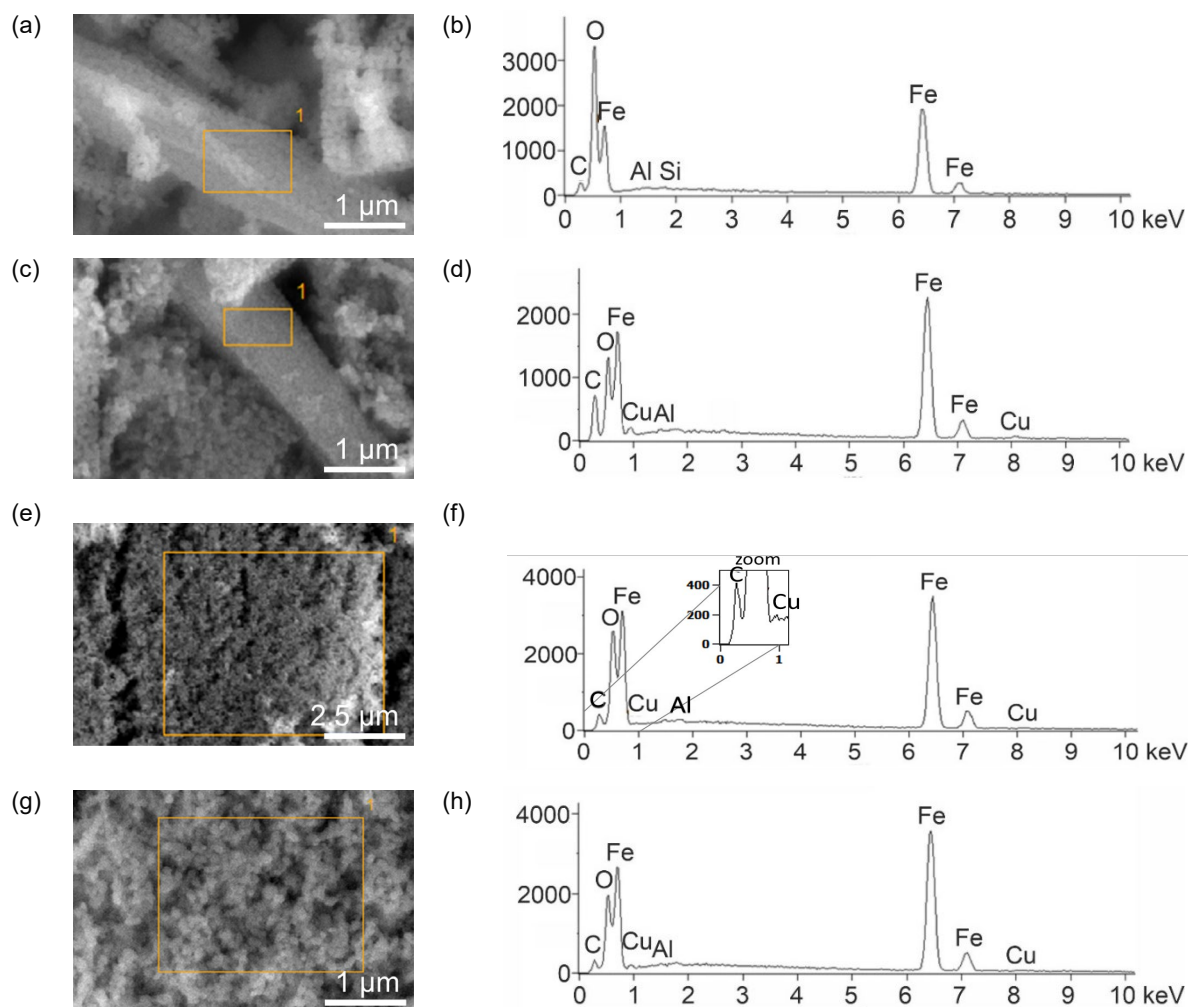

**Figure S14.** SEM images of the spent catalysts and EDX of the selected part of the image in highlighted rectangles with included particles, (a, b) spent  $\text{FeO}_x$ , (c, d) spent 1%-Cu/ $\text{FeO}_x$ , (e, f) spent 3%-Cu/ $\text{FeO}_x$ , (g, h) spent 5%-Cu/ $\text{FeO}_x$ .

### STEM/HAADF images of spent $\text{FeO}_x$

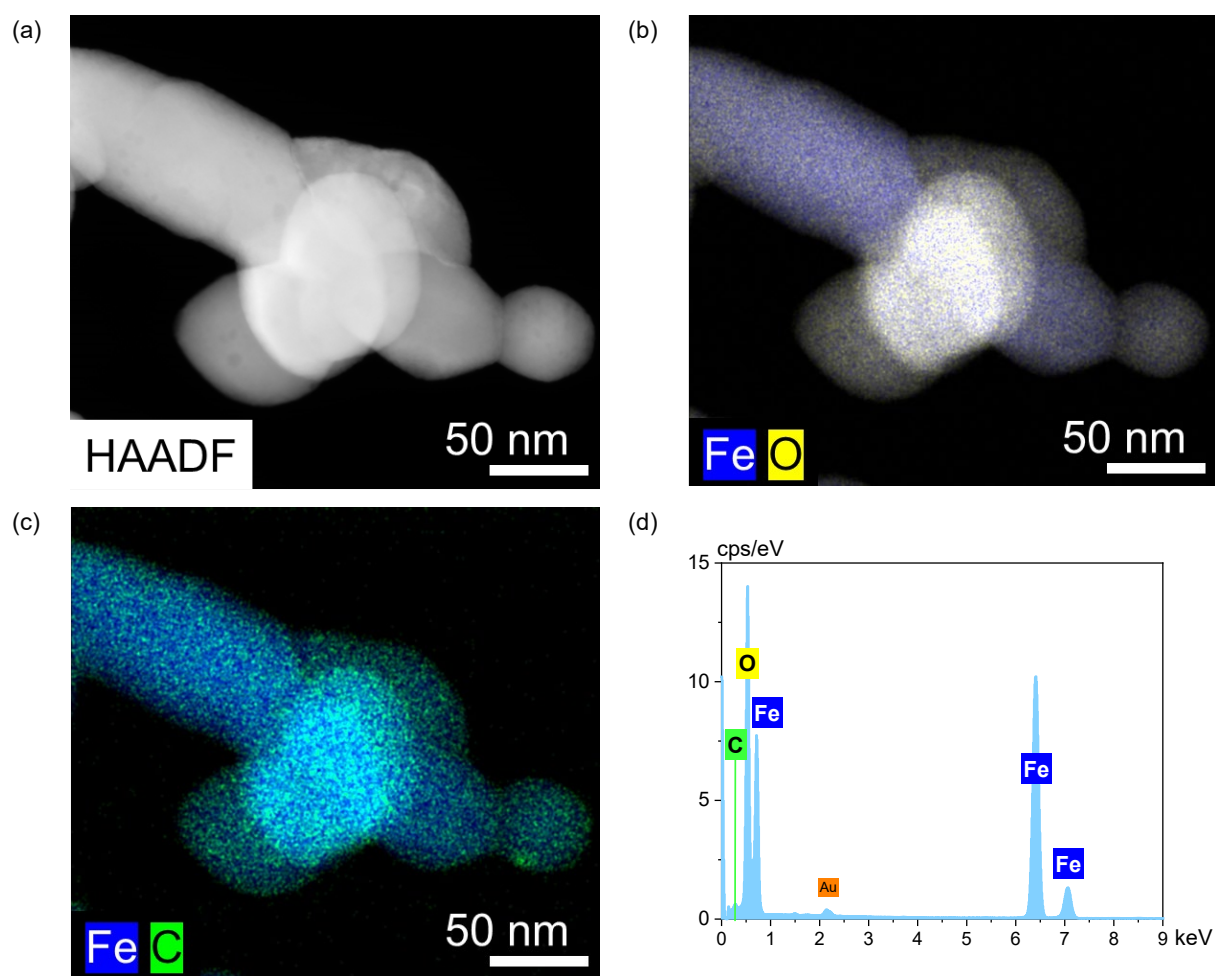

**Figure S15.** (a) STEM-HAADF of spent  $\text{FeO}_x$ , and (b-d) EDX elemental mapping of Fe, O, C and Cu.



# STEM/HAADF images of spent 1%-Cu/FeO<sub>x</sub>

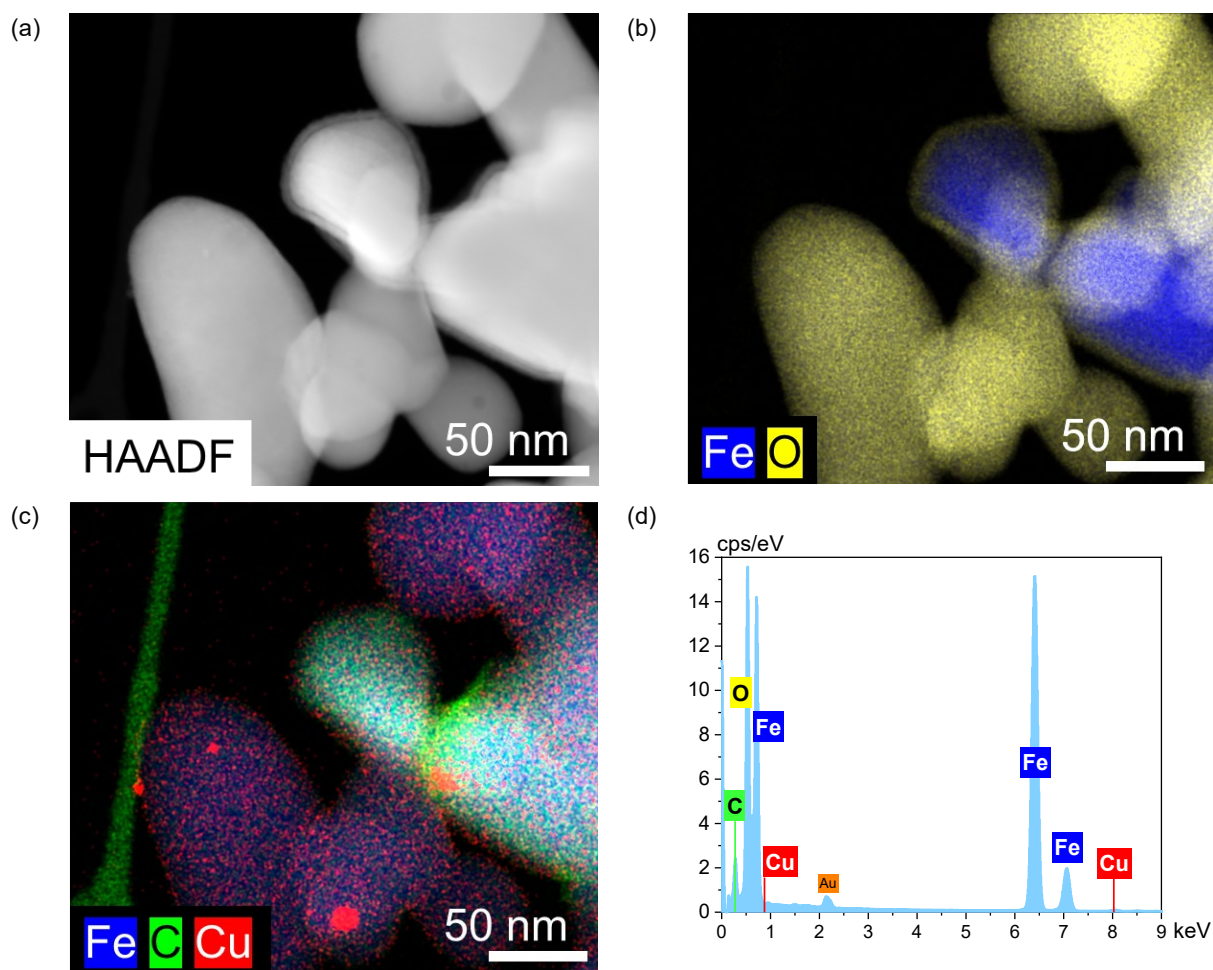

**Figure S16.** (a) STEM-HAADF of spent 1%-Cu/FeO<sub>x</sub>, and (b-d) EDX elemental mapping of Fe, O, C and Cu.

# STEM/HAADF images of spent 3%-Cu/FeO<sub>x</sub>

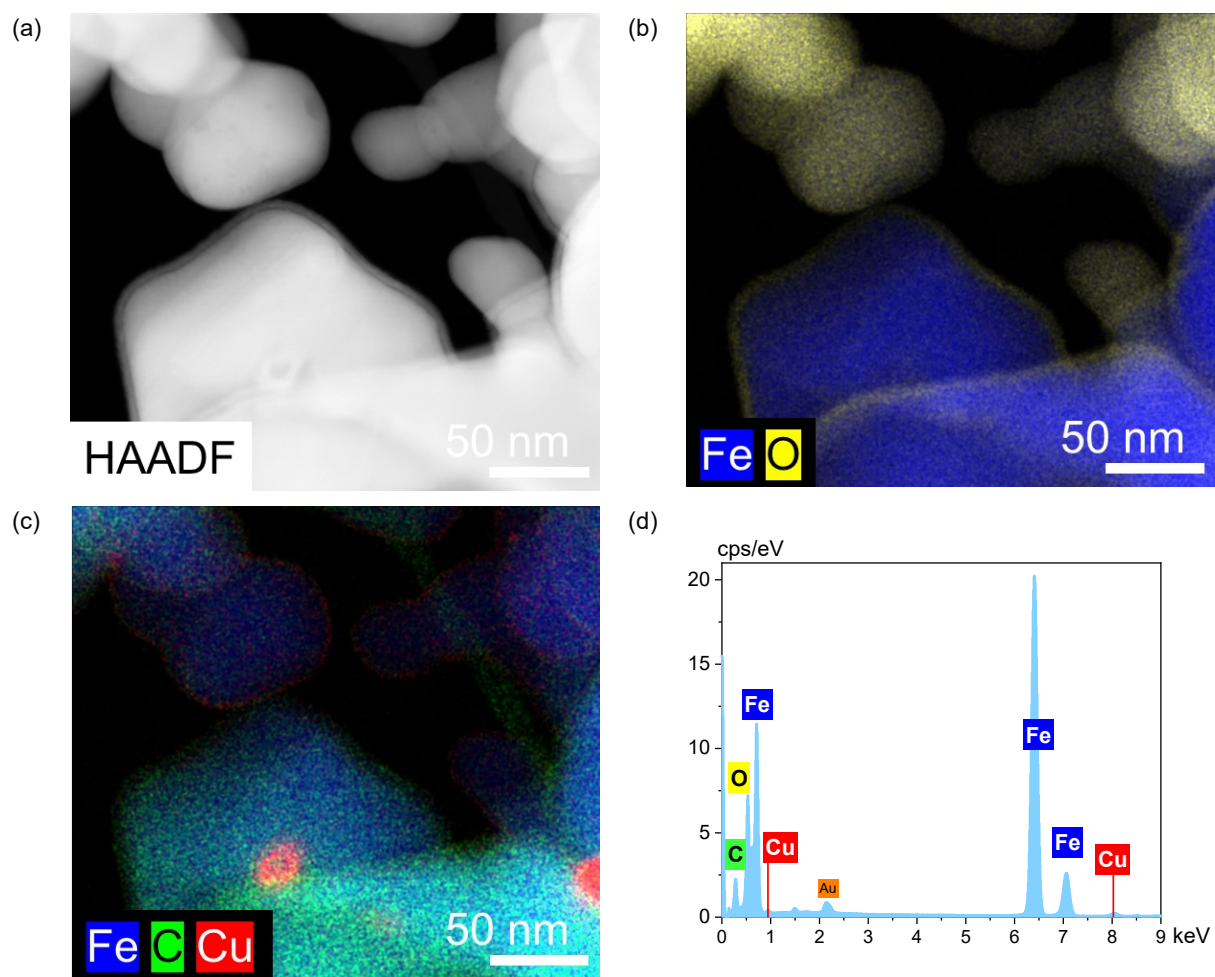

**Figure S17.** (a) STEM-HAADF of spent 3%-Cu/FeO<sub>x</sub>, and (b-d) EDX elemental mapping of Fe, O, C and Cu.

## XRD patterns of spent catalysts

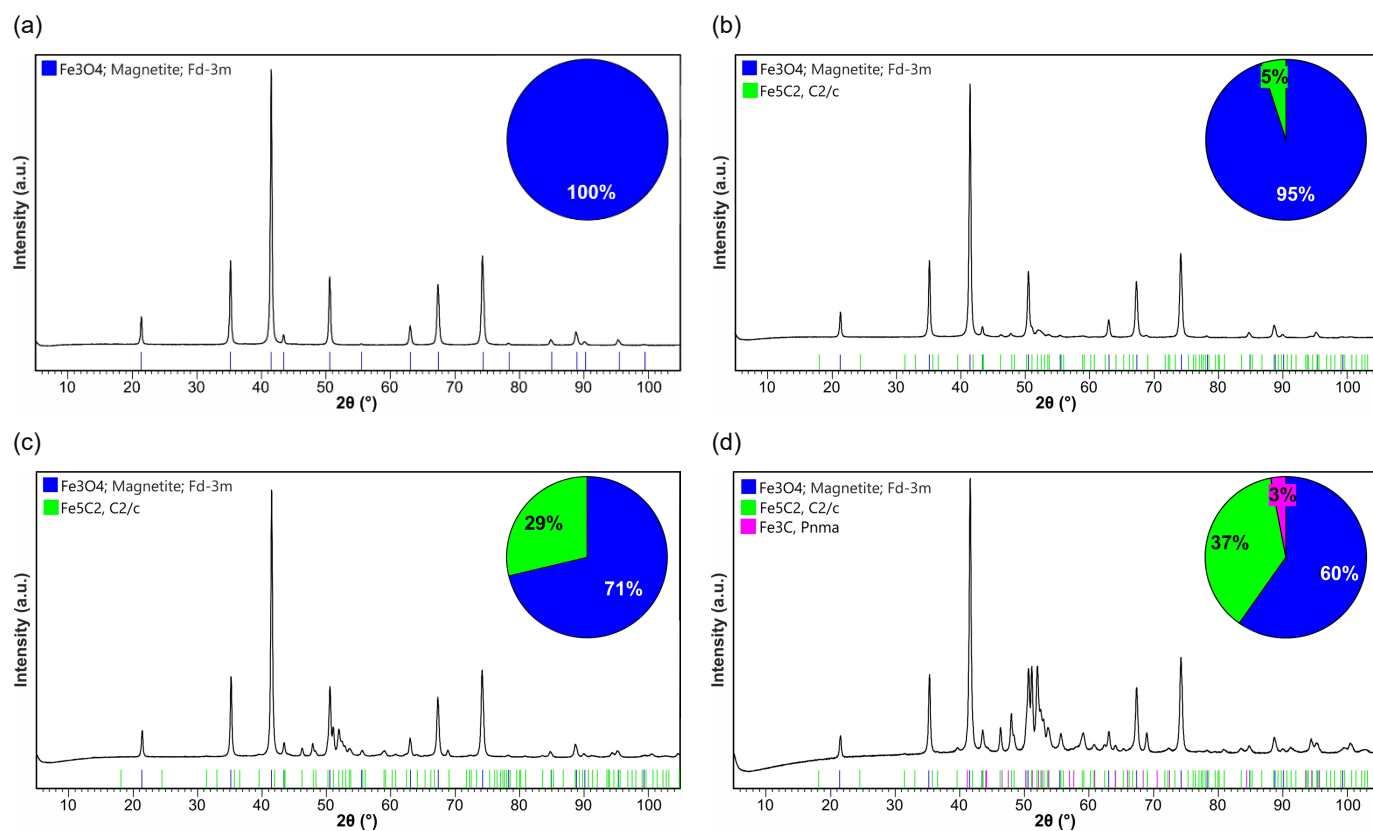

**Figure S18.** XRD patterns of spent (a) FeO<sub>x</sub>, (b) 1%-Cu/FeO<sub>x</sub>, (c) 3%-Cu/FeO<sub>x</sub> and (d) 5%-Cu/FeO<sub>x</sub>.

## Mean X-ray coherence length of spent catalysts

**Table S4.** Mean X-ray coherence length of spent catalysts obtained from XRD data using Rietveld refinement of analysis.

| Catalyst               | Fe <sub>3</sub> O <sub>4</sub><br>[nm] | Fe <sub>5</sub> C <sub>2</sub><br>[nm] | Fe <sub>3</sub> C<br>[nm] |
|------------------------|----------------------------------------|----------------------------------------|---------------------------|
| FeO <sub>x</sub>       | 63.0                                   | 0.0                                    | 0.0                       |
| 1%-Cu/FeO <sub>x</sub> | 63.0                                   | 29.0                                   | 0.0                       |
| 3%-Cu/FeO <sub>x</sub> | 47.0                                   | 40.0                                   | 0.0                       |
| 5%-Cu/FeO <sub>x</sub> | 36.0                                   | 35.0                                   | 23.0                      |

## Adsorption/desorption isotherms of spent catalysts

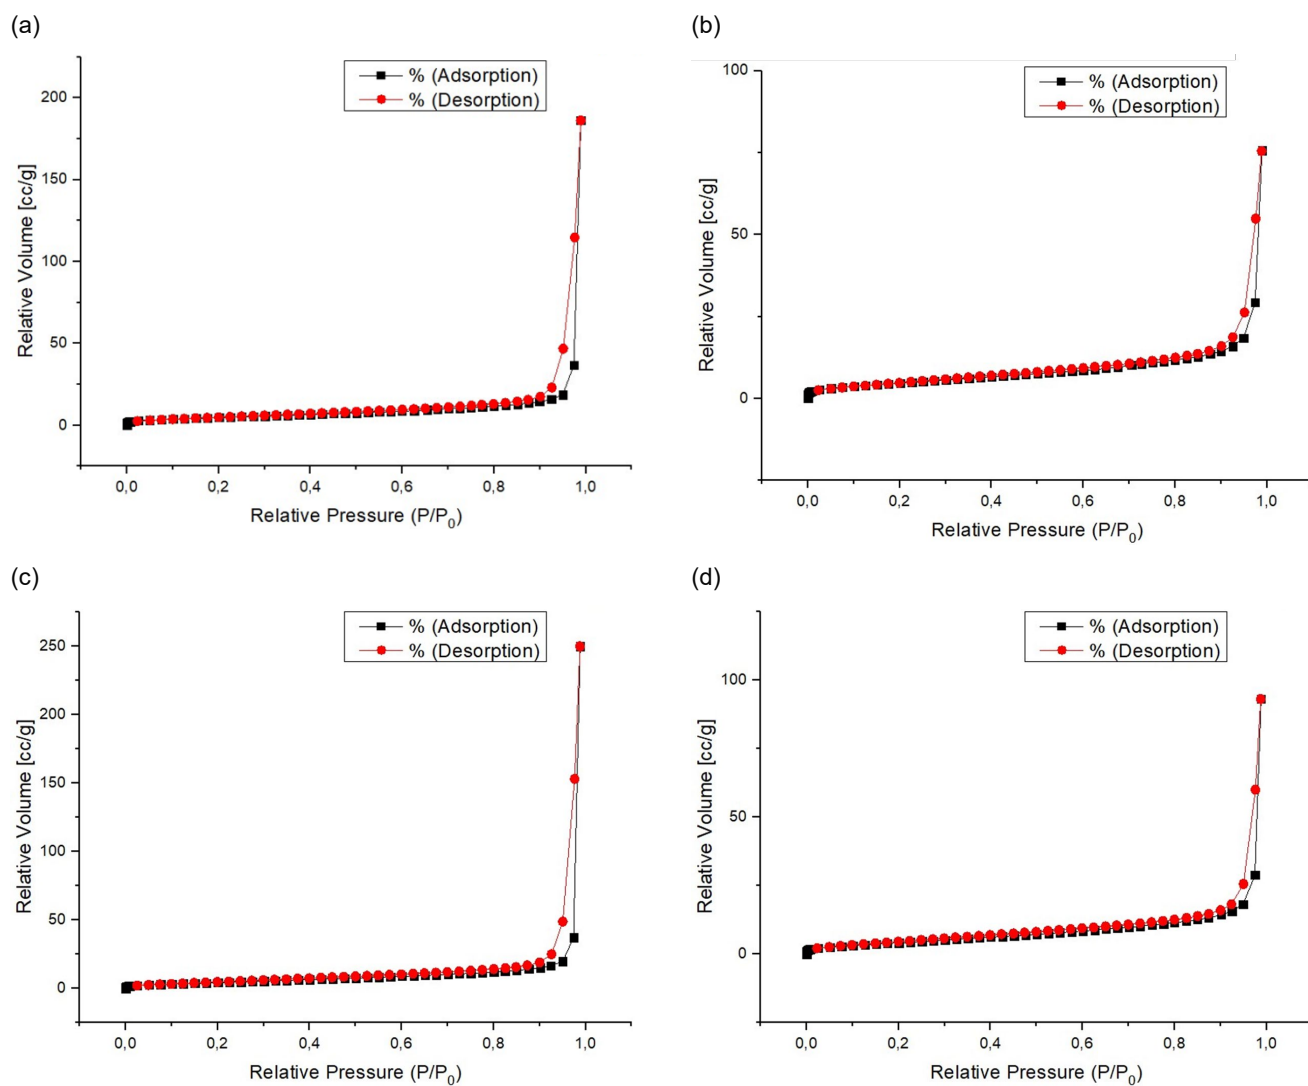

**Figure S19.** Adsorption and desorption isotherms of spent (a)  $\text{FeO}_x$ , (b) 1%-Cu/ $\text{FeO}_x$ , (c) 3%-Cu/ $\text{FeO}_x$  and (d) 5%-Cu/ $\text{FeO}_x$ .



## Comparison of the performance of the catalysts as the function of temperature during the second ramp

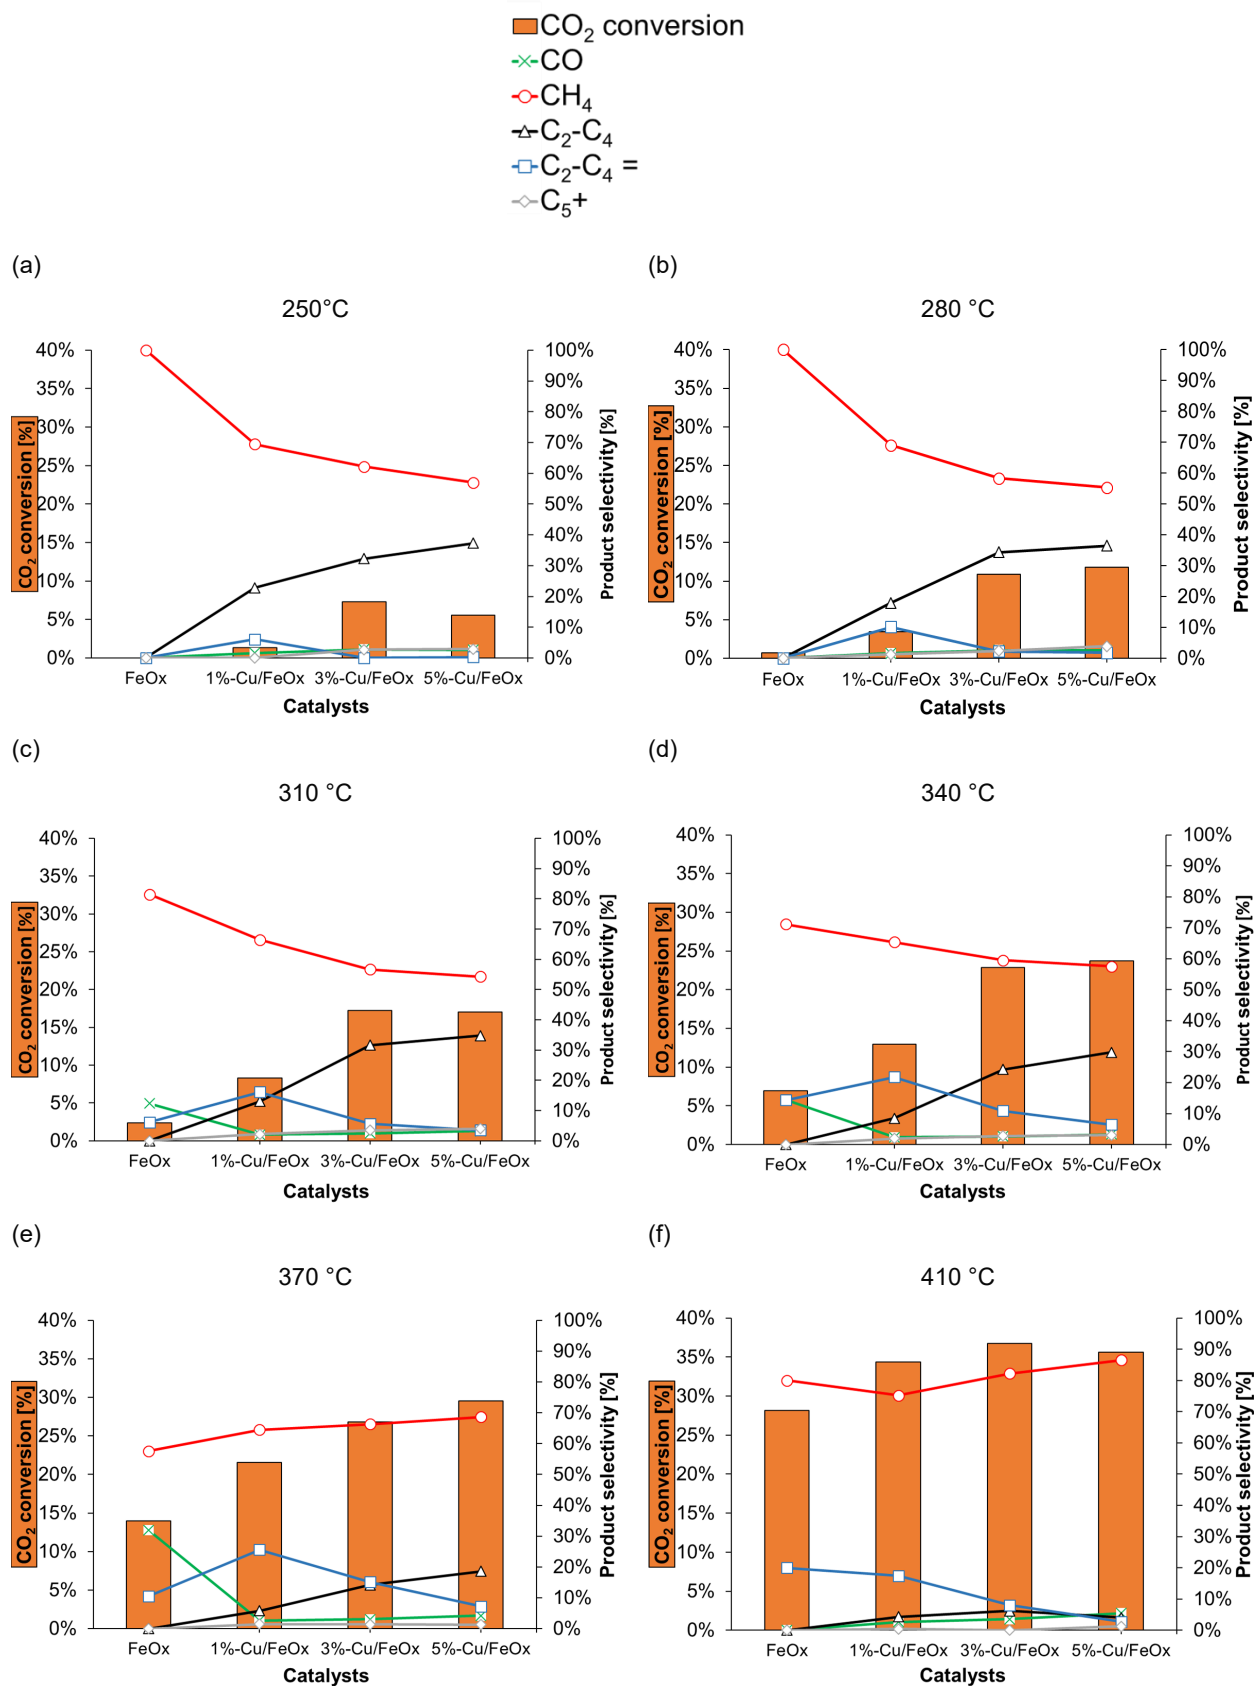

**Figure S20.** (a-f) CO<sub>2</sub> conversion and product selectivity of the studied catalysts as the function of temperature during the second temperature ramp.

## CO<sub>2</sub> conversion over the course of six consecutive temperature ramps

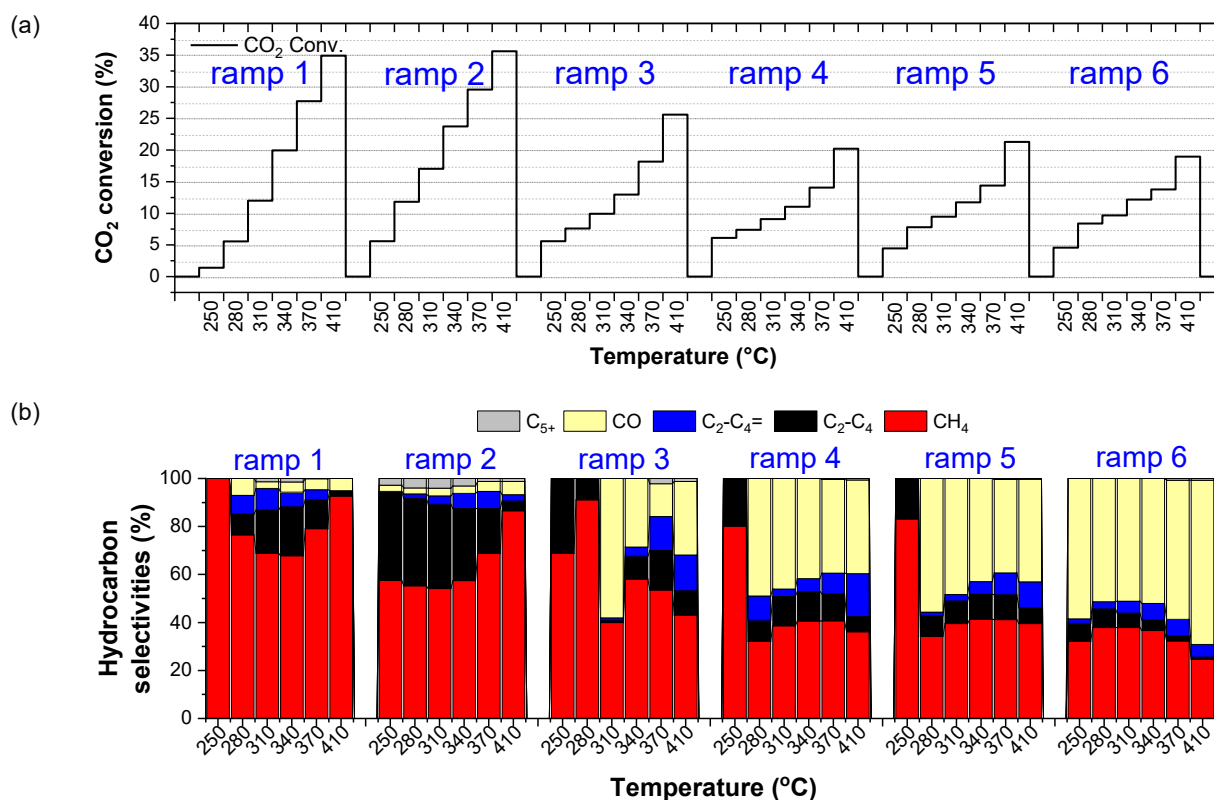

**Figure S21.** 5%-Cu/FeO<sub>x</sub>. (a) CO<sub>2</sub> conversion throughout 6 consecutive temperature ramps. (b) Product selectivity throughout 6 consecutive temperature ramps. CO<sub>2</sub> 200 mg of catalyst and CO<sub>2</sub>/H<sub>2</sub>/He (1:5:4, total flow 25 ml/min).

## Literature comparison of CO<sub>2</sub> hydrogenation by different iron-based catalysts

**Table S5.** Literature review of Fe-based catalysts for CO<sub>2</sub> hydrogenation

| Entry | Cat.                                                | Temp. (°C) | Pretreatment                                           | CO <sub>2</sub> Conv. (%) | Selectivity (%) |      |                                |                                |                             | Ref. |
|-------|-----------------------------------------------------|------------|--------------------------------------------------------|---------------------------|-----------------|------|--------------------------------|--------------------------------|-----------------------------|------|
|       |                                                     |            |                                                        |                           | CH <sub>4</sub> | CO   | C <sub>2</sub> -C <sub>4</sub> | C <sub>2</sub> -C <sub>4</sub> | C <sub>5</sub> + and others |      |
| 1     | 1%-Cu/FeO <sub>x</sub>                              | 370        | None                                                   | 23.5                      | 60.5            | 2.5  | 29                             | 5.7                            | 2.3                         | *    |
| 2     | 3%-Cu/FeO <sub>x</sub>                              | 370        | None                                                   | 27.3                      | 62.7            | 2.7  | 14.6                           | 17.7                           | 2.3                         | *    |
| 3     | 5%-Cu/FeO <sub>x</sub>                              | 370        | None                                                   | 27.8                      | 78.3            | 4.4  | 4.5                            | 12.3                           | 0.4                         | *    |
| 4     | Fe-Mn-K                                             | 300        | H <sub>2</sub> :CO=2:1, 320°C, 24h                     | 38.2                      | 10.4            | 5.6  | 25.2                           | 2                              | 61.9                        | [1]  |
| 5     | Fe-Co/Al <sub>2</sub> O <sub>3</sub> -K             | 300        | H <sub>2</sub> , 400°C, 2h                             | 36                        | 16              | 13   | -                              | 71                             | -                           | [2]  |
| 6     | Fe/Co-Y                                             | 300        | H <sub>2</sub> , 380°C, 8h                             | 29.6                      | 14              | 21   | -                              | 30                             | 55                          | [3]  |
| 7     | Na/FeO <sub>x</sub>                                 | 320        | H <sub>2</sub> , 350°C, 12h                            | 36                        | 8               | 10   | 64                             | 18                             | -                           | [4]  |
| 8     | Ru-FeO <sub>x</sub> /Al <sub>2</sub> O <sub>3</sub> | 300        | H <sub>2</sub> , 300°C                                 | 18                        | 55              | -    | -                              | 45                             | -                           | [5]  |
| 9     | Fe-Ru-K                                             | 300        | H <sub>2</sub> , 450°C, 5h                             | 47                        | 16.4            | 3.1  | 19.7                           | 7.4                            | 53                          | [6]  |
| 10    | Fe-K/alumina                                        | 300        | H <sub>2</sub> , 450°C, 13h                            | 31.3                      | 11              | 7    | -                              | 36                             | 46                          | [7]  |
| 11    | Fe/CNT                                              | 350        | H <sub>2</sub> , 400°C, 2h                             | 20                        | 36              | 22   | -                              | 33                             | 9                           | [8]  |
| 12    | Cu/Fe <sub>2</sub> O <sub>3</sub>                   | 300        | H <sub>2</sub> , 400°C, 2h                             | 17                        | 2-3             | 31   | -                              | 32                             | 65                          | [9]  |
| 13    | Na-Fe <sub>3</sub> O <sub>4</sub> /HMCM             | 320        | H <sub>2</sub> , 350°C, 8h                             | 26                        | 8               | 17   | -                              | 26                             | 57                          | [10] |
| 14    | ZnFe <sub>2</sub> O <sub>4</sub>                    | 340        | H <sub>2</sub> , 400°C, 2h                             | 28                        | 44              | 22   | -                              | 34                             | -                           | [11] |
| 15    | Fe-Ru-Mn-K/Al <sub>2</sub> O <sub>3</sub>           | 300        | 10% H <sub>2</sub> , 500°C, 2h                         | 30                        | 19              | 18   | -                              | 39                             | 25                          | [12] |
| 16    | Co-Fe                                               | 270        | CO, 250°C, 20h                                         | 23                        | 31              | 53   | -                              | 12                             | -                           | [13] |
| 17    | Mn-Na-Fe                                            | 320        | H <sub>2</sub> , 350°C, 12h                            | 38.6                      | 11.8            | 11.8 | 30.2                           | 4                              | 42.1                        | [14] |
| 18    | Fe-Ce                                               | 300        | 33% H <sub>2</sub> , 400°C, 16h;<br>33% CO, 400°C, 16h | 25                        | 38              | 19   | -                              | 38                             | 4                           | [15] |
| 19    | Na-Fe <sub>3</sub> O <sub>4</sub>                   | 320        | H <sub>2</sub> , 350°C, 12h                            | 40.5                      | 15.8            | 13.5 | 46.6                           | 7.5                            | 30.1                        | [16] |
| 20    | Mn/Fe <sub>3</sub> O <sub>4</sub> -EDA              | 320        | None                                                   | 20                        | 40              | 41   | 1                              | 36                             | 23                          | [17] |
| 21    | K-FeC/ZrO <sub>2</sub>                              | 220        | H <sub>2</sub> , 400°C, 4h                             | 40                        | 13              | 32   | 25                             | -                              | 30                          | [18] |
| 22    | Fe-Cu-K-Al                                          | 300        | CO, 350°C, 4h                                          | 41                        | 15.6            | 2.5  | -                              | 38                             | 44                          | [19] |
| 23    | Fe-Cu-K                                             | 300        | H <sub>2</sub> , 400°C, 2h                             | 29.7                      | 7               | 17   | 22                             | -                              | 54                          | [20] |
| 24    | Na-CoFe <sub>3</sub> O <sub>4</sub>                 | 320        | H <sub>2</sub> , 400°C, 3h                             | 34                        | 15              | -    | 39                             | 6                              | 40                          | [21] |
| 25    | Fe <sub>2</sub> O <sub>3</sub>                      | 300        | 50% H <sub>2</sub> , 500°C, 2h                         | 23                        | 14              | n.a  | -                              | -                              | 65                          | [22] |
| 26    | K-Fe <sub>2</sub> O <sub>3</sub>                    | 270        | H <sub>2</sub> :CO=1:1, 350°C, 1h                      | 36                        | 20              | 13   | 35                             | 8                              | 24                          | [23] |
| 27    | Mn-FeO                                              | 340        | H <sub>2</sub> , 400°C, 5h                             | 30                        | 40              | 7    | -                              | 52                             | n.a                         | [24] |

\* This work.

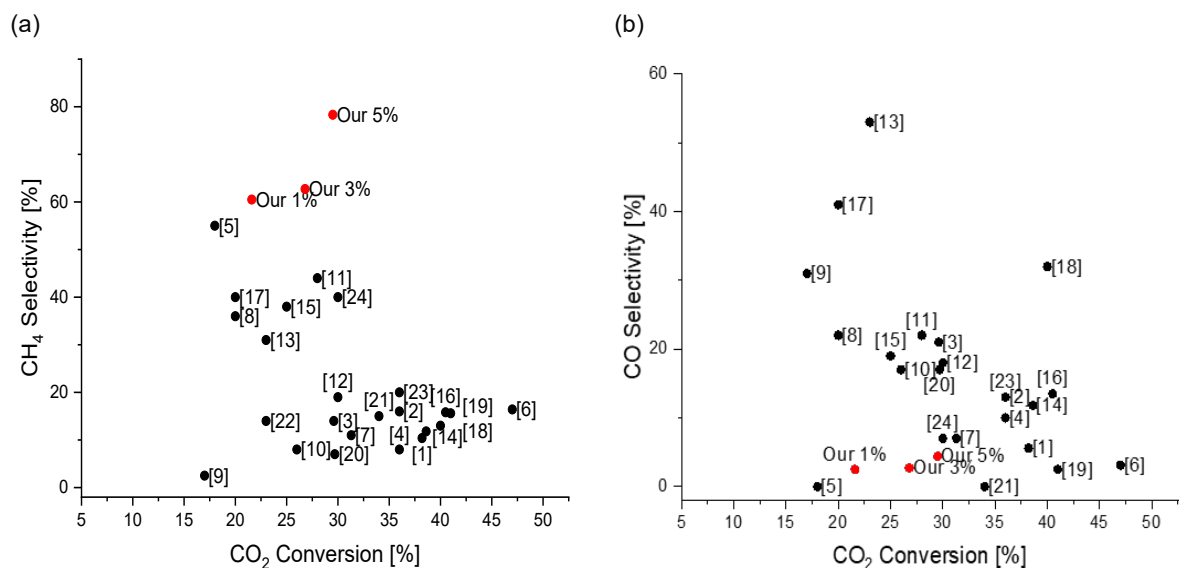

**Figure S22.** (a) CH<sub>4</sub> selectivity plotted against CO<sub>2</sub> conversion and (b) CO selectivity plotted against CO<sub>2</sub> conversion for catalysts from literature review (**Table S5**) including reference numbers. Our catalysts are red points.

## References

1. Yao, B.; Xiao, T.; Makgae, O.A.; Jie, X.; Gonzalez-Cortes, S.; Guan, S.; Kirkland, A.I.; Dilworth, J.R.; Al-Megren, H.A.; Alshihri, S.M., et al. Transforming Carbon Dioxide into Jet Fuel Using an Organic Combustion-Synthesized Fe-Mn-K Catalyst. *Nat Commun* **2020**, *11* (1), 6395.
2. Satthawong, R.; Koizumi, N.; Song, C.; Prasassarakich, P. Bimetallic Fe-Co Catalysts for CO<sub>2</sub> Hydrogenation to Higher Hydrocarbons. *J. CO<sub>2</sub> Util.* **2013**, *3-4*, 102-106.
3. Guo, L.; Cui, Y.; Li, H.; Fang, Y.; Prasert, R.; Wu, J.; Yang, G.; Yoneyama, Y.; Tsubaki, N. Selective Formation of Linear-Alpha Olefins (Laos) by CO<sub>2</sub> Hydrogenation over Bimetallic Fe/Co-Y Catalyst. *Catal Commun* **2019**, *130*, 105759.
4. Liang, B.; Duan, H.; Sun, T.; Ma, J.; Liu, X.; Xu, J.; Su, X.; Huang, Y.; Zhang, T. Effect of Na Promoter on Fe-Based Catalyst for CO<sub>2</sub> Hydrogenation to Alkenes. *ACS Sustain. Chem. Eng* **2019**, *7* (1), 925-932.
5. Aitbekova, A.; Goodman, E.D.; Wu, L.; Boubnov, A.; Hoffman, A.S.; Genc, A.; Cheng, H.; Casalena, L.; Bare, S.R.; Cargnello, M. Engineering of Ruthenium-Iron Oxide Colloidal Heterostructures: Improved Yields in CO<sub>2</sub> Hydrogenation to Hydrocarbons. *Angew. Chem. Int. Ed.* **2019**, *58* (48), 17451-17457.
6. Jiang, F.; Liu, B.; Geng, S.; Xu, Y.; Liu, X. Hydrogenation of CO<sub>2</sub> into Hydrocarbons: Enhanced Catalytic Activity over Fe-Based Fischer-Tropsch Catalysts. *Catal. Sci. Technol.* **2018**, *8* (16), 4097-4107.
7. Hwang, J.S.; Jun, K.-W.; Lee, K.-W. Deactivation and Regeneration of Fe-K/Alumina Catalyst in CO<sub>2</sub> Hydrogenation. *APPL CATAL A-GEN* **2001**, *208* (1), 217-222.
8. Chernyak, S.A.; Ivanov, A.S.; Stolbov, D.N.; Maksimov, S.V.; Maslakov, K.I.; Chernavskii, P.A.; Pokusaeva, Y.A.; Koklin, A.E.; Bogdan, V.I.; Savilov, S.V. Sintered Fe/Cnt Framework Catalysts for CO<sub>2</sub> Hydrogenation into Hydrocarbons. *Carbon* **2020**.
9. Choi, Y.H.; Jang, Y.J.; Park, H.; Kim, W.Y.; Lee, Y.H.; Choi, S.H.; Lee, J.S. Carbon Dioxide Fischer-Tropsch Synthesis: A New Path to Carbon-Neutral Fuels. *Appl Catal B* **2017**, *202*, 605-610.
10. Wei, J.; Yao, R.; Ge, Q.; Wen, Z.; Ji, X.; Fang, C.; Zhang, J.; Xu, H.; Sun, J. Catalytic Hydrogenation of CO<sub>2</sub> to Isoparaffins over Fe-Based Multifunctional Catalysts. *ACS Catal.* **2018**, *8* (11), 9958-9967.
11. Choi, Y.H.; Ra, E.C.; Kim, E.H.; Kim, K.Y.; Jang, Y.J.; Kang, K.-N.; Choi, S.H.; Jang, J.-H.; Lee, J.S. Sodium-Containing Spinel Zinc Ferrite as a Catalyst Precursor for the Selective Synthesis of Liquid Hydrocarbon Fuels. *ChemSusChem* **2017**, *10* (23), 4764-4770.
12. Rodemerck, U.; Holeňa, M.; Wagner, E.; Smejkal, Q.; Barkschat, A.; Baerns, M. Catalyst Development for CO<sub>2</sub> Hydrogenation to Fuels. *ChemCatChem* **2013**, *5* (7), 1948-1955.
13. Gnanamani, M.K.; Jacobs, G.; Hamdeh, H.H.; Shafer, W.D.; Liu, F.; Hopps, S.D.; Thomas, G.A.; Davis, B.H. Hydrogenation of Carbon Dioxide over Co-Fe Bimetallic Catalysts. *ACS Catal.* **2016**, *6* (2), 913-927.
14. Liang, B.; Sun, T.; Ma, J.; Duan, H.; Li, L.; Yang, X.; Zhang, Y.; Su, X.; Huang, Y.; Zhang, T. Mn Decorated Na/Fe Catalysts for CO<sub>2</sub> Hydrogenation to Light Olefins. *Catal. Sci. Technol.* **2019**, *9* (2), 456-464.
15. Pérez-Alonso, F.J.; Ojeda, M.; Herranz, T.; Rojas, S.; González-Carballo, J.M.; Terreros, P.; Fierro, J.L.G. Carbon Dioxide Hydrogenation over Fe-Ce Catalysts. *Catal Commun* **2008**, *9* (9), 1945-1948.
16. Wei, J.; Sun, J.; Wen, Z.; Fang, C.; Ge, Q.; Xu, H. New Insights into the Effect of Sodium on Fe<sub>3</sub>O<sub>4</sub>-Based Nanocatalysts for CO<sub>2</sub> Hydrogenation to Light Olefins. *Catal. Sci. Technol.* **2016**, *6* (13), 4786-4793.
17. Liu, B.; Geng, S.; Zheng, J.; Jia, X.; Jiang, F.; Liu, X. Unravelling the New Roles of Na and Mn Promoter in CO<sub>2</sub> Hydrogenation over Fe<sub>3</sub>O<sub>4</sub>-Based Catalysts for Enhanced Selectivity to Light A-Olefins. *ChemCatChem* **2018**, *10* (20), 4718-4732.
18. Zhu, J.; Zhang, G.; Li, W.; Zhang, X.; Ding, F.; Song, C.; Guo, X. Deconvolution of the Particle Size Effect on CO<sub>2</sub> Hydrogenation over Iron-Based Catalysts. *ACS Catalysis* **2020**, *10* (13), 7424-7433.
19. Hong, J.-S.; Hwang, J.S.; Jun, K.-W.; Sur, J.C.; Lee, K.-W. Deactivation Study on a Coprecipitated Fe-Cu-K-Al Catalyst in CO<sub>2</sub> Hydrogenation. *APPL CATAL A-GEN* **2001**, *218* (1), 53-59.
20. Wang, W.; Jiang, X.; Wang, X.; Song, C. Fe-Cu Bimetallic Catalysts for Selective CO<sub>2</sub> Hydrogenation to Olefin-Rich C<sub>2</sub><sup>+</sup> Hydrocarbons. *Ind. Eng. Chem. Res.* **2018**, *57* (13), 4535-4542.
21. Kim, K.Y.; Lee, H.; Noh, W.Y.; Shin, J.; Han, S.J.; Kim, S.K.; An, K.; Lee, J.S. Cobalt Ferrite Nanoparticles to Form a Catalytic Co-Fe Alloy Carbide Phase for Selective CO<sub>2</sub> Hydrogenation to Light Olefins. *ACS Catal.* **2020**, *10* (15), 8660-8671.
22. Albrecht, M.; Rodemerck, U.; Schneider, M.; Bröring, M.; Baabe, D.; Kondratenko, E.V. Unexpectedly Efficient CO<sub>2</sub> Hydrogenation to Higher Hydrocarbons over Non-Doped Fe<sub>2</sub>O<sub>3</sub>. *Appl Catal B* **2017**, *204*, 119-126.
23. Visconti, C.G.; Martinelli, M.; Falbo, L.; Infantes-Molina, A.; Lietti, L.; Forzatti, P.; Iaquaniello, G.; Palo, E.; Picutti, B.; Brignoli, F. CO<sub>2</sub> Hydrogenation to Lower Olefins on a High Surface Area K-Promoted Bulk Fe-Catalyst. *Appl Catal B* **2017**, *200*, 530-542.



24. Al-Dossary, M.; Ismail, A.A.; Fierro, J.L.G.; Bouzid, H.; Al-Sayari, S.A. Effect of Mn Loading onto Mn/FeO Nanocomposites for the CO<sub>2</sub> Hydrogenation Reaction. *Appl Catal B* **2015**, *165*, 651-660.
